# Supplementary material for: Molecular Characterization of Chronic Lymphocytic Leukemia Patients with a High Number of Losses in 13q14
Source: PLoS One. 2012 Nov 13;7(11):e48485. doi: 10.1371/journal.pone.0048485 (PMC3496725; doi:10.1371/journal.pone.0048485)
Supplement: Table S1 — Clinical and biological features of CLL patients included in the study. (XLS) [file pone.0048485.s005.xls]

## Sheet: Table S1
Table S1.	Clinical and biological features of CLL patients included in the study.
Parameter	Category
Age (years), median (range)		68 (35-90)
Gender	Male	0.66
White blood cells/mL (range)		21,545 (7,100-261,000)
Lymphocytes/mL (range)		15,290 (4,100-237,000)
Hemoglobin, g/dL (range)		14.3 (7.1-16.8)
Platelet count/mL (range)		171,500 (59,000-399,000)
IGHV	Unmutated	0.48
ZAP70	Positive	0.43
CD38	Positive	0.24
Binet stage	A	0.69
	B	0.26
	C	0.05
LDH	Normal	0.84
	High	0.16
b2microglobulin	Normal	0.52
	High	0.48
Bone marrow pattern	Diffuse	0.41
	Other	0.59
Lymphadenopathy	Yes	0.26
	No	0.65
Hepatomegaly	Yes	0.11
	No	0.89
Splenomegaly	Yes	0.28
	No	0.72
B symptoms	Yes	0.07
	No	0.92
Dead during follow-up	Yes	0.17
	No	0.83
Results expressed as median or percentages
