# Supplementary material for: Molecular Characterization of Chronic Lymphocytic Leukemia Patients with a High Number of Losses in 13q14
Source: PLoS One. 2012 Nov 13;7(11):e48485. doi: 10.1371/journal.pone.0048485 (PMC3496725; doi:10.1371/journal.pone.0048485)
Supplement: Table S2 — Sequences of primers used for SYBR Green detection. (XLS) [file pone.0048485.s006.xls]

## Sheet: Table S2
Table S2.		Sequences of primers used for SYBR Green detection.
	Primer designation	Sequence (5´-3´)
	ABL1
	Forward	GCCCTAGCTTTACGCTCATCAC
	Reverse	GCTGTAAGAACCGCATAAAACGAT
	SYK
	Forward	GTGATGGGCTTTATTTGCTG
	Reverse	TGTAGTGGTGTGCCTTCCTC
	PRKCB1
	Forward	AAGGCAGCTTTGGCAAGGT
	Reverse	CGTCCTTCTTCAGGATCTTCACA
	BLNK
	Forward	ACCACTTCAATAGCTGACTCCA
	Reverse	CCATTGCTTCAGACACTTTCC
	LEF1
	Forward	GACGAGATGATCCCCTTCAA
	Reverse	AGGGCTCCTGAGAGGTTTGT
	BCL2
	Forward	CCCATCAATCTTCAGCACTC
	Reverse	CTGGGAATCGATCTGGAAAT
	RRAS2
	Forward	GATCGTGATGAGTTCCCAATGA
	Reverse	TTGCTGATGCCTCCATGTATG
	E2F1
	Forward	TGGCTGGGCGTGTAGGA
	Reverse	TTCCCCAGGCTCACCAAAG
	GAS7
	Forward	GAGAGGCAAGCACGCTATCC
	Reverse	CCCGCCCACTTTGAATAAAC
	FCRL2
	Forward	GAAAGGCTGGGCAAAAGAGTT
	Reverse	CCTCATGCTCCCTGATCCTC
