# Supplementary material for: Molecular Characterization of Chronic Lymphocytic Leukemia Patients with a High Number of Losses in 13q14
Source: PLoS One. 2012 Nov 13;7(11):e48485. doi: 10.1371/journal.pone.0048485 (PMC3496725; doi:10.1371/journal.pone.0048485)
Supplement: Table S4 — miRNAs and their predicted targets (n = 1027) that are significantly deregulated in 13q-H CLL patients. By applying an integrated miRNA-mRNA analysis, mRNA targets were identified for the list of miRNAs deregulated in 13q-H CLL patients. The P-value for each predicted target gene refers to the contrast between 13q-H and 13q-L CLL patients. (XLS) [file pone.0048485.s008.xls]

## Sheet: Table S4
Table S4.	miRNAs and their predicted targets (n=1027) that are significantly deregulated in 13q-H CLL patients.
	By applying an integrated miRNA-mRNA analysis, mRNA targets were identified for the list of miRNAs deregulated in 13q-H CLL patients. The P-value for each predicted target gene refers to the contrast between 13q-H and 13q-L CLL patients.
hsa-mir-106b	R fold= 0.519
Source	Confidence	ID	Symbol	q#value	R#fold
TargetScan Human	High (predicted)	ENSG00000115977	AAK1	0.00273113	0.508134
TargetScan Human	High (predicted)	ENSG00000140526	ABHD2	0.0392734	0.649611
TargetScan Human	High (predicted)	ENSG00000068366	ACSL4	0.0206337	0.793209
TargetScan Human	High (predicted)	ENSG00000138107	ACTR1A	0.0239712	0.677849
TargetScan Human	High (predicted)	ENSG00000135503	ACVR1B	0.0225281	0.598581
TargetScan Human	High (predicted)	ENSG00000168615	ADAM9	0.000429357	0.248808
TargetScan Human	High (predicted)	ENSG00000189007	ADAT2	0.0253781	0.756898
TargetScan Human	High (predicted)	ENSG00000006831	ADIPOR2	0.000429357	0.626745
TargetScan Human	High (predicted)	ENSG00000172493	AFF1	0.033733	0.725208
TargetScan Human	High (predicted)	ENSG00000155966	AFF2	0.00359732	0.488556
TargetScan Human	High (predicted)	ENSG00000106351	AGFG2	0.0225281	0.893209
TargetScan Human	High (predicted)	ENSG00000135049	AGTPBP1	0.0145136	0.614751
TargetScan Human	High (predicted)	ENSG00000023516	AKAP11	0.0268675	1.64805
TargetScan Human	High (predicted)	ENSG00000133805	AMPD3	0.00491982	0.534181
TargetScan Human	High (predicted)	ENSG00000151458	ANKRD50	0.000429357	0.396993
Ingenuity Expert Findings,TargetScan Human,miRecords	Experimentally Observed,High (predicted)	ENSG00000142192	APP	0.011255	0.385323
TargetScan Human	High (predicted)	ENSG00000145819	ARHGAP26	0.0422724	0.679823
TargetScan Human	High (predicted)	ENSG00000132694	ARHGEF11	0.00840935	0.801134
TargetScan Human	High (predicted)	ENSG00000156802	ATAD2	0.00543476	0.462675
TargetScan Human	High (predicted)	ENSG00000126775	ATG14		0.684463
TargetScan Human	High (predicted)	ENSG00000085978	ATG16L1	0.00133474	0.62006
TargetScan Human	High (predicted)	ENSG00000110046	ATG2A	0.0508521	0.611909
TargetScan Human	High (predicted)	ENSG00000124788	ATXN1	0.0381341	1.66251
TargetScan Human	High (predicted)	ENSG00000118276	B4GALT6	0.0188104	0.791847
TargetScan Human,miRecords	Experimentally Observed,High (predicted)	ENSG00000171791	BCL2	0.0310091	2.13244
Ingenuity Expert Findings,TargetScan Human,miRecords	Experimentally Observed,High (predicted)	ENSG00000153094	BCL2L11	0.0169583	0.578441
TargetScan Human	High (predicted)	ENSG00000188761	BCL2L15	0.0249253	0.626045
TargetScan Human	High (predicted)	ENSG00000125845	BMP2	0.0276811	0.79102
TargetScan Human,miRecords	Experimentally Observed,High (predicted)	ENSG00000204217	BMPR2	0.0283458	2.0709
Ingenuity Expert Findings,TargetScan Human	Experimentally Observed,High (predicted)	ENSG00000140299	BNIP2	0.0464041	0.700581
TargetScan Human	High (predicted)	ENSG00000104765	BNIP3L	0.036095	0.585551
TargetScan Human	High (predicted)	ENSG00000186470	BTN3A2	0.0129067	2.67592
TargetScan Human	High (predicted)	ENSG00000165490	C11orf82	0.0489205	0.844257
TargetScan Human	High (predicted)	ENSG00000125149	C16orf70	0.0135326	0.683008
TargetScan Human	High (predicted)	ENSG00000177576	C18orf32	0.0223778	1.72655
TargetScan Human	High (predicted)	ENSG00000127423	C1orf135	0.0047399	0.556081
TargetScan Human	High (predicted)	ENSG00000094975	C1orf9	0.00172144	0.528886
TargetScan Human	High (predicted)	ENSG00000215494	C2CD2		2.108
TargetScan Human	High (predicted)	ENSG00000178074	C2orf69		0.648929
TargetScan Human	High (predicted)	ENSG00000135387	CAPRIN1	0.0364191	0.777457
TargetScan Human	High (predicted)	ENSG00000106144	CASP2	0.0133136	0.656546
TargetScan Human	High (predicted)	ENSG00000064012	CASP8	0.00200186	0.559407
TargetScan Human	High (predicted)	ENSG00000107443	CCNJ	0.0133869	0.796861
TargetScan Human	High (predicted)	ENSG00000094880	CDC23	0.0160574	0.629035
TargetScan Human	High (predicted)	ENSG00000144354	CDCA7	0.00164166	0.470827
TargetScan Human	High (predicted)	ENSG00000138092	CENPO	0.013182	0.58177
TargetScan Human	High (predicted)	ENSG00000167670	CHAF1A	0.0160087	0.719572
TargetScan Human	High (predicted)	ENSG00000204116	CHIC1	0.0309059	1.28271
TargetScan Human	High (predicted)	ENSG00000122966	CIT	0.00478656	0.468265
TargetScan Human	High (predicted)	ENSG00000136108	CKAP2	0.0191234	0.617157
TargetScan Human	High (predicted)	ENSG00000166527	CLEC4D	0.0247777	0.355973
TargetScan Human	High (predicted)	ENSG00000188243	COMMD6	0.00856015	1.52806
TargetScan Human	High (predicted)	ENSG00000173085	COQ2	0.0201331	0.724902
TargetScan Human	High (predicted)	ENSG00000107864	CPEB3	0.00438682	1.62509
TargetScan Human	High (predicted)	ENSG00000147408	CSGALNACT1	0.0036367	0.315385
TargetScan Human	High (predicted)	ENSG00000204435	CSNK2B		0.443656
TargetScan Human	High (predicted)	ENSG00000144677	CTDSPL	0.00842892	0.485969
TargetScan Human	High (predicted)	ENSG00000064601	CTSA	0.0214584	0.643795
TargetScan Human	High (predicted)	ENSG00000186529	CYP4F3	0.0153196	0.376163
TargetScan Human	High (predicted)	ENSG00000153071	DAB2	0.00348115	0.516411
TargetScan Human	High (predicted)	ENSG00000183283	DAZAP2	0.0127224	0.689448
TargetScan Human	High (predicted)	ENSG00000170456	DENND5B		2.09
TargetScan Human	High (predicted)	ENSG00000133059	DSTYK		0.541712
TargetScan Human	High (predicted)	ENSG00000167065	DUSP18	0.0343864	1.38062
TargetScan Human	High (predicted)	ENSG00000135720	DYNC1LI2	0.0117245	0.604605
Ingenuity Expert Findings,TarBase,TargetScan Human,miRecords	Experimentally Observed,High (predicted)	ENSG00000101412	E2F1	0.0078122	0.664914
TargetScan Human	High (predicted)	ENSG00000007968	E2F2	0.0029093	0.237757
TargetScan Human	High (predicted)	ENSG00000112242	E2F3	0.0246106	0.671815
TargetScan Human	High (predicted)	ENSG00000133740	E2F5	0.025226	2.62402
TargetScan Human	High (predicted)	ENSG00000102189	EEA1	0.00712081	2.15092
TargetScan Human	High (predicted)	ENSG00000106682	EIF4H		0.545256
TargetScan Human	High (predicted)	ENSG00000196411	EPHB4	0.0350851	0.816861
TargetScan Human	High (predicted)	ENSG00000124882	EREG	0.00115482	0.232399
TargetScan Human	High (predicted)	ENSG00000138439	FAM117B		1.645
TargetScan Human	High (predicted)	ENSG00000155744	FAM126B	0.0153025	0.750519
TargetScan Human	High (predicted)	ENSG00000138640	FAM13A		0.655308
TargetScan Human	High (predicted)	ENSG00000151553	FAM160B1		0.533333
TargetScan Human	High (predicted)	ENSG00000107771	FAM190B		1.441
TargetScan Human	High (predicted)	ENSG00000196937	FAM3C	0.00840935	2.4948
TargetScan Human	High (predicted)	ENSG00000128578	FAM40B	0.00255486	0.609114
TargetScan Human	High (predicted)	ENSG00000119979	FAM45A		0.71582
TargetScan Human	High (predicted)	ENSG00000183508	FAM46C	0.0185728	0.548152
TargetScan Human	High (predicted)	ENSG00000168672	FAM84B	0.0316582	0.780741
TargetScan Human	High (predicted)	ENSG00000164896	FASTK	0.0349967	1.20502
TargetScan Human	High (predicted)	ENSG00000118564	FBXL5	0.00250097	0.449172
TargetScan Human	High (predicted)	ENSG00000163013	FBXO41	0.037153	1.26228
TargetScan Human	High (predicted)	ENSG00000145780	FEM1C	0.00933931	0.615555
TargetScan Human	High (predicted)	ENSG00000139132	FGD4	0.0353151	0.57273
TargetScan Human	High (predicted)	ENSG00000137942	FNBP1L	0.033187	0.638443
TargetScan Human	High (predicted)	ENSG00000075420	FNDC3B	0.00293295	0.422624
TargetScan Human	High (predicted)	ENSG00000140564	FURIN	0.0154817	0.493093
TargetScan Human	High (predicted)	ENSG00000114416	FXR1	0.0489587	0.782573
TargetScan Human	High (predicted)	ENSG00000114450	GNB4	0.00146885	0.37271
TargetScan Human	High (predicted)	ENSG00000125772	GPCPD1		0.739098
TargetScan Human	High (predicted)	ENSG00000115159	GPD2	0.0280815	1.59409
TargetScan Human	High (predicted)	ENSG00000112406	HECA	0.0274563	0.664659
TargetScan Human	High (predicted)	ENSG00000165338	HECTD2	0.0182085	1.5907
TargetScan Human	High (predicted)	ENSG00000173706	HEG1	0.0479173	0.626714
TargetScan Human	High (predicted)	ENSG00000100644	HIF1A	0.0125888	0.361119
TargetScan Human	High (predicted)	ENSG00000144711	IQSEC1	0.0317763	0.636514
TargetScan Human	High (predicted)	ENSG00000168264	IRF2BP2	0.0063955	0.5662
TargetScan Human	High (predicted)	ENSG00000115232	ITGA4	0.00375861	0.307472
TargetScan Human	High (predicted)	ENSG00000170871	KIAA0232	0.00156286	0.65042
TargetScan Human	High (predicted)	ENSG00000119682	KIAA0317	0.00286662	0.556664
TargetScan Human	High (predicted)	ENSG00000135709	KIAA0513	0.0101159	0.541435
TargetScan Human	High (predicted)	ENSG00000137807	KIF23	0.00590079	0.291623
TargetScan Human	High (predicted)	ENSG00000101350	KIF3B	0.0255465	1.25571
TargetScan Human	High (predicted)	ENSG00000155090	KLF10	0.0483227	0.556132
TargetScan Human	High (predicted)	ENSG00000109787	KLF3	0.00647948	0.357798
TargetScan Human	High (predicted)	ENSG00000117153	KLHL12	0.00733799	0.772578
TargetScan Human	High (predicted)	ENSG00000162869	KLRAQ1		1.354
TargetScan Human	High (predicted)	ENSG00000102753	KPNA3	0.00568736	0.522393
TargetScan Human	High (predicted)	ENSG00000135537	LACE1	0.0236492	1.26281
TargetScan Human	High (predicted)	ENSG00000068697	LAPTM4A	0.013736	0.646084
TargetScan Human	High (predicted)	ENSG00000172292	LASS6	0.0209125	0.483274
TargetScan Human	High (predicted)	ENSG00000130164	LDLR	0.0145276	0.627318
TargetScan Human	High (predicted)	ENSG00000144749	LRIG1	0.0246106	0.661925
TargetScan Human,miRecords	Experimentally Observed,High (predicted)	ENSG00000139625	MAP3K12	0.0329989	1.25387
TargetScan Human	High (predicted)	ENSG00000006062	MAP3K14	0.0396532	1.3477
TargetScan Human	High (predicted)	ENSG00000006432	MAP3K9	0.0044791	1.40027
TargetScan Human	High (predicted)	ENSG00000101367	MAPRE1	0.0232655	0.693819
TargetScan Human	High (predicted)	ENSG00000145495	MARCH6		0.648929
TargetScan Human	High (predicted)	ENSG00000099308	MAST3	0.0423591	1.37792
TargetScan Human	High (predicted)	ENSG00000204406	MBD5	0.0078122	1.68028
TargetScan Human	High (predicted)	ENSG00000143384	MCL1	0.0055235	0.570002
TargetScan Human	High (predicted)	ENSG00000144893	MED12L	0.0022918	0.566467
TargetScan Human	High (predicted)	ENSG00000164024	METAP1	0.0295451	0.680636
TargetScan Human	High (predicted)	ENSG00000198948	MFAP3L	0.0386184	0.755091
TargetScan Human	High (predicted)	ENSG00000116688	MFN2	0.00133474	0.508632
TargetScan Human	High (predicted)	ENSG00000074416	MGLL	0.020944	0.708396
TargetScan Human	High (predicted)	ENSG00000186260	MKL2	0.0149901	2.18341
TargetScan Human	High (predicted)	ENSG00000133606	MKRN1	0.0055235	0.455618
TargetScan Human	High (predicted)	ENSG00000108292	MLLT6	0.0327303	1.26533
TargetScan Human	High (predicted)	ENSG00000188786	MTF1	0.00173484	0.680653
TargetScan Human	High (predicted)	ENSG00000100330	MTMR3	0.00173134	0.528478
TargetScan Human	High (predicted)	ENSG00000059728	MXD1	0.0197478	0.443747
TargetScan Human	High (predicted)	ENSG00000172915	NBEA	0.0298268	1.58909
TargetScan Human	High (predicted)	ENSG00000144959	NCEH1		0.596303
TargetScan Human	High (predicted)	ENSG00000166579	NDEL1	0.0113926	0.680364
TargetScan Human	High (predicted)	ENSG00000049759	NEDD4L	0.0163796	0.641395
TargetScan Human	High (predicted)	ENSG00000122126	OCRL	0.010871	0.640408
TargetScan Human	High (predicted)	ENSG00000021762	OSBPL5	0.0241712	0.698184
TargetScan Human	High (predicted)	ENSG00000135124	P2RX4	0.0393207	0.721836
TargetScan Human	High (predicted)	ENSG00000076641	PAG1	0.00375492	0.326238
TargetScan Human	High (predicted)	ENSG00000120137	PANK3	0.0133603	0.703474
TargetScan Human	High (predicted)	ENSG00000167081	PBX3	0.00445666	2.22196
TargetScan Human	High (predicted)	ENSG00000168300	PCMTD1	0.00903024	2.74006
TargetScan Human	High (predicted)	ENSG00000197646	PDCD1LG2	0.00207318	1.33042
TargetScan Human	High (predicted)	ENSG00000152270	PDE3B	0.0110286	0.478154
TargetScan Human	High (predicted)	ENSG00000173517	PEAK1		1.411
TargetScan Human	High (predicted)	ENSG00000170525	PFKFB3	0.0372335	0.543948
TargetScan Human	High (predicted)	ENSG00000156531	PHF6	0.0177132	1.69678
TargetScan Human	High (predicted)	ENSG00000145675	PIK3R1	0.00224525	0.3753
Ingenuity Expert Findings,TargetScan Human	Experimentally Observed,High (predicted)	ENSG00000118762	PKD2 (includes EG:18764)		0.552486
TargetScan Human	High (predicted)	ENSG00000160199	PKNOX1	0.0182631	1.33158
TargetScan Human	High (predicted)	ENSG00000126003	PLAGL2	0.0147503	0.640595
TargetScan Human	High (predicted)	ENSG00000182621	PLCB1	0.00926129	0.773217
TargetScan Human	High (predicted)	ENSG00000120756	PLS1	0.00688082	0.712745
TargetScan Human	High (predicted)	ENSG00000114698	PLSCR4	0.0354075	0.812343
TargetScan Human	High (predicted)	ENSG00000006757	PNPLA4	0.0243348	1.42842
TargetScan Human	High (predicted)	ENSG00000051341	POLQ	0.00224525	0.486477
Ingenuity Expert Findings	Experimentally Observed	ENSG00000132170	PPARG	0.0267022	0.710907
TargetScan Human	High (predicted)	ENSG00000113575	PPP2CA	0.0355185	0.625025
TargetScan Human	High (predicted)	ENSG00000119414	PPP6C	0.0289145	0.630549
TargetScan Human	High (predicted)	ENSG00000105063	PPP6R1		0.809717
TargetScan Human	High (predicted)	ENSG00000142875	PRKACB	0.0112868	0.576939
TargetScan Human	High (predicted)	ENSG00000135378	PRRG4	0.0394865	0.667844
Ingenuity Expert Findings,TargetScan Human	Experimentally Observed,High (predicted)	ENSG00000171862	PTEN	0.0103269	1.3162
TargetScan Human	High (predicted)	ENSG00000151490	PTPRO	0.0095711	1.69477
TargetScan Human	High (predicted)	ENSG00000185129	PURA	0.0290147	1.65435
TargetScan Human	High (predicted)	ENSG00000161800	RACGAP1	0.00152522	0.29883
TargetScan Human	High (predicted)	ENSG00000109756	RAPGEF2	0.0133136	0.559549
TargetScan Human	High (predicted)	ENSG00000198915	RASGEF1A	0.0511575	0.788419
TargetScan Human	High (predicted)	ENSG00000089902	RCOR1	0.000955417	0.488725
TargetScan Human	High (predicted)	ENSG00000165476	REEP3	0.0137029	1.61972
TargetScan Human	High (predicted)	ENSG00000181826	RELL1	0.00715744	0.389349
TargetScan Human	High (predicted)	ENSG00000155366	RHOC	0.0283653	1.47632
TargetScan Human	High (predicted)	ENSG00000135828	RNASEL	0.0397106	1.42344
TargetScan Human	High (predicted)	ENSG00000123091	RNF11	0.0241567	0.57237
TargetScan Human	High (predicted)	ENSG00000127870	RNF6	0.0216604	0.775931
TargetScan Human	High (predicted)	ENSG00000025039	RRAGD	0.00438682	0.29782
TargetScan Human	High (predicted)	ENSG00000171848	RRM2	0.000955417	0.224052
Ingenuity Expert Findings,TargetScan Human,miRecords	Experimentally Observed,High (predicted)	ENSG00000159216	RUNX1	0.0105478	0.796744
TargetScan Human	High (predicted)	ENSG00000152700	SAR1B	0.0345088	0.709929
TargetScan Human	High (predicted)	ENSG00000169439	SDC2	0.0268879	0.647322
TargetScan Human	High (predicted)	ENSG00000166401	SERPINB8	0.0273804	0.739568
TargetScan Human	High (predicted)	ENSG00000144040	SFXN5	0.0291851	0.754242
TargetScan Human	High (predicted)	ENSG00000105738	SIPA1L3	0.0198295	2.1112
TargetScan Human	High (predicted)	ENSG00000077713	SLC25A43	0.0175892	1.54938
TargetScan Human	High (predicted)	ENSG00000181856	SLC2A4	0.025226	0.59996
TargetScan Human	High (predicted)	ENSG00000138449	SLC40A1	0.000852751	0.238048
TargetScan Human	High (predicted)	ENSG00000139508	SLC46A3	0.0115707	1.84378
TargetScan Human	High (predicted)	ENSG00000196517	SLC6A9	0.0307282	0.596132
TargetScan Human	High (predicted)	ENSG00000198742	SMURF1	0.0390528	0.537666
TargetScan Human	High (predicted)	ENSG00000130340	SNX9	0.0391306	0.506169
TargetScan Human	High (predicted)	ENSG00000170677	SOCS6	0.00173484	0.517986
TargetScan Human	High (predicted)	ENSG00000137642	SORL1	0.0188096	0.401905
TargetScan Human	High (predicted)	ENSG00000115904	SOS1	0.0286317	2.35175
TargetScan Human	High (predicted)	ENSG00000124766	SOX4	0.0139287	0.749434
TargetScan Human	High (predicted)	ENSG00000133104	SPG20	0.00226695	0.40464
TargetScan Human	High (predicted)	ENSG00000179119	SPTY2D1	0.0257425	0.738741
TargetScan Human	High (predicted)	ENSG00000161011	SQSTM1	0.0296896	0.618163
TargetScan Human	High (predicted)	ENSG00000141298	SSH2	0.0363816	1.46011
TargetScan Human	High (predicted)	ENSG00000117155	SSX2IP	0.00255486	0.438697
TargetScan Human,miRecords	Experimentally Observed,High (predicted)	ENSG00000168610	STAT3	0.0185278	0.662586
TargetScan Human	High (predicted)	ENSG00000081320	STK17B	0.0159602	0.616725
TargetScan Human	High (predicted)	ENSG00000131018	SYNE1	0.0125065	0.656584
TargetScan Human	High (predicted)	ENSG00000147526	TACC1	0.0370618	0.734342
TargetScan Human	High (predicted)	ENSG00000162367	TAL1	0.0063955	0.398808
TargetScan Human	High (predicted)	ENSG00000170921	TANC2	0.0115707	0.484854
TargetScan Human	High (predicted)	ENSG00000135090	TAOK3	0.0201257	1.49348
TargetScan Human	High (predicted)	ENSG00000104946	TBC1D17	0.0240549	1.31425
TargetScan Human	High (predicted)	ENSG00000101849	TBL1X	0.0314486	1.36715
TargetScan Human	High (predicted)	ENSG00000152760	TCTEX1D1	0.0185278	0.50115
TargetScan Human	High (predicted)	ENSG00000187605	TET3	0.00430449	0.626591
TargetScan Human	High (predicted)	ENSG00000139644	TMBIM6		0.717875
TargetScan Human	High (predicted)	ENSG00000172765	TMCC1	0.0196903	1.62257
TargetScan Human	High (predicted)	ENSG00000152558	TMEM123	0.0121689	0.555092
TargetScan Human	High (predicted)	ENSG00000170647	TMEM133	0.00952535	1.90822
TargetScan Human	High (predicted)	ENSG00000170417	TMEM182	0.0120821	1.75424
TargetScan Human	High (predicted)	ENSG00000146072	TNFRSF21	0.02139	0.588214
TargetScan Human	High (predicted)	ENSG00000079308	TNS1	0.0212113	0.539038
TargetScan Human	High (predicted)	ENSG00000104447	TRPS1	0.0476527	0.677237
TargetScan Human	High (predicted)	ENSG00000074319	TSG101	0.0235243	0.726535
TargetScan Human	High (predicted)	ENSG00000133985	TTC9	0.00207899	1.50664
TargetScan Human	High (predicted)	ENSG00000104343	UBE2W	0.043343	0.780907
TargetScan Human	High (predicted)	ENSG00000173960	UBXN2A		0.769231
TargetScan Human	High (predicted)	ENSG00000177169	ULK1	0.0220962	0.738825
TargetScan Human	High (predicted)	ENSG00000132478	UNK	0.0411249	1.22477
TargetScan Human	High (predicted)	ENSG00000169062	UPF3A	0.0227961	2.97546
TargetScan Human	High (predicted)	ENSG00000162402	USP24	0.0205562	0.628656
TargetScan Human	High (predicted)	ENSG00000048028	USP28	0.0348691	1.60076
TargetScan Human	High (predicted)	ENSG00000140455	USP3	0.0412547	0.726859
TargetScan Human	High (predicted)	ENSG00000115652	UXS1	0.0360959	0.760044
TargetScan Human,miRecords	Experimentally Observed,High (predicted)	ENSG00000112715	VEGFA		0.686342
miRecords	Experimentally Observed	ENSG00000026025	VIM	0.0206113	0.608255
TargetScan Human	High (predicted)	ENSG00000147852	VLDLR	0.0507938	0.79266
TargetScan Human	High (predicted)	ENSG00000129003	VPS13C	0.017763	1.82562
TargetScan Human	High (predicted)	ENSG00000139668	WDFY2	0.00347223	0.569983
TargetScan Human	High (predicted)	ENSG00000163625	WDFY3	0.0373132	0.632673
TargetScan Human	High (predicted)	ENSG00000047056	WDR37	0.00259091	0.668819
TargetScan Human	High (predicted)	ENSG00000176105	YES1	0.0123221	0.601838
TargetScan Human	High (predicted)	ENSG00000180667	YOD1	0.00239736	0.470311
TargetScan Human	High (predicted)	ENSG00000100027	YPEL1	0.00771438	1.91546
TargetScan Human	High (predicted)	ENSG00000166793	YPEL4	0.0313408	0.485841
TargetScan Human	High (predicted)	ENSG00000185728	YTHDF3	0.0327688	0.70516
TargetScan Human	High (predicted)	ENSG00000091436	ZAK		0.706714
TargetScan Human	High (predicted)	ENSG00000174282	ZBTB4	0.00922708	1.62249
TargetScan Human	High (predicted)	ENSG00000160062	ZBTB8A		0.745156
TargetScan Human	High (predicted)	ENSG00000149289	ZC3H12C	0.0231515	0.630042
TargetScan Human	High (predicted)	ENSG00000131381	ZFYVE20	0.0425431	0.81518
TargetScan Human	High (predicted)	ENSG00000171940	ZNF217	0.0131621	1.30607
TargetScan Human	High (predicted)	ENSG00000165244	ZNF367	0.00478656	0.464425
TargetScan Human	High (predicted)	ENSG00000161642	ZNF385A	0.05241	0.716656
TargetScan Human	High (predicted)	ENSG00000074657	ZNF532	0.0257561	1.61196
TargetScan Human	High (predicted)	ENSG00000019995	ZRANB1	0.0246106	0.754719
hsa-mir-134	R fold= 1.809
Source	Confidence	ID	Symbol	q#value	R#fold
TargetScan Human	High (predicted)	ENSG00000140526	ABHD2	0.0392734	0.649611
TargetScan Human	High (predicted)	ENSG00000144218	AFF3	0.0424066	1.87855
TargetScan Human	High (predicted)	ENSG00000151458	ANKRD50	0.000429357	0.396993
TargetScan Human	High (predicted)	ENSG00000117475	BLZF1	0.00539509	0.727523
TargetScan Human	High (predicted)	ENSG00000070269	C14orf101	0.0237804	1.4912
TargetScan Human	High (predicted)	ENSG00000129480	C14orf126	0.0125065	1.74149
TargetScan Human	High (predicted)	ENSG00000120647	CCDC77	0.014259	1.64559
TargetScan Human	High (predicted)	ENSG00000204116	CHIC1	0.0309059	1.28271
TargetScan Human	High (predicted)	ENSG00000137449	CPEB2	0.00616431	0.713659
TargetScan Human	High (predicted)	ENSG00000008405	CRY1	0.0463079	0.471706
TargetScan Human	High (predicted)	ENSG00000165659	DACH1	0.00650356	0.64598
TargetScan Human	High (predicted)	ENSG00000147459	DOCK5		0.598802
TargetScan Human	High (predicted)	ENSG00000143924	EML4	0.00488693	0.49833
TargetScan Human	High (predicted)	ENSG00000152102	FAM168B		0.746826
TargetScan Human	High (predicted)	ENSG00000176853	FAM91A1	0.0180565	0.58692
TargetScan Human	High (predicted)	ENSG00000197465	GYPE	0.0212724	0.254478
TargetScan Human	High (predicted)	ENSG00000144668	ITGA9	0.00438682	0.579648
TargetScan Human	High (predicted)	ENSG00000197705	KLHL14	0.00269982	2.9685
TargetScan Human	High (predicted)	ENSG00000198948	MFAP3L	0.0386184	0.755091
TargetScan Human	High (predicted)	ENSG00000138722	MMRN1	0.0219725	0.634526
TargetScan Human	High (predicted)	ENSG00000117751	PPP1R8	0.0227335	0.740316
TargetScan Human	High (predicted)	ENSG00000069974	RAB27A	0.00570802	0.415941
TargetScan Human	High (predicted)	ENSG00000051180	RAD51	0.00923651	0.688095
TargetScan Human	High (predicted)	ENSG00000136828	RALGPS1	0.0251724	1.49061
TargetScan Human	High (predicted)	ENSG00000054967	RELT	0.0123221	0.698929
TargetScan Human	High (predicted)	ENSG00000164466	SFXN1	0.00430449	0.519233
TargetScan Human	High (predicted)	ENSG00000111252	SH2B3	0.00226695	0.623148
TargetScan Human	High (predicted)	ENSG00000184900	SUMO3	0.00687857	0.707534
TargetScan Human	High (predicted)	ENSG00000139437	TCHP	0.0428594	1.24145
TargetScan Human	High (predicted)	ENSG00000100426	ZBED4	0.00688082	0.729587
TargetScan Human	High (predicted)	ENSG00000070476	ZXDC	0.0174512	0.799863
hsa-mir-155	R fold= 3.701
Source	Confidence	ID	Symbol	q#value	R#fold
TargetScan Human	High (predicted)	ENSG00000115977	AAK1	0.00273113	0.508134
TargetScan Human	High (predicted)	ENSG00000173208	ABCD2	0.0185278	1.6669
TargetScan Human	High (predicted)	ENSG00000140526	ABHD2	0.0392734	0.649611
TargetScan Human	High (predicted)	ENSG00000177674	AGTRAP	0.0130925	0.620939
TarBase,TargetScan Human,miRecords	Experimentally Observed,High (predicted)	ENSG00000111732	AICDA	0.0136786	1.37336
TargetScan Human	High (predicted)	ENSG00000166295	ANAPC16		2.206
TarBase	Experimentally Observed	ENSG00000164144	ARFIP1	0.0402374	1.46425
TarBase,TargetScan Human	Experimentally Observed,High (predicted)	ENSG00000165997	ARL5B	0.0247751	0.603546
TargetScan Human	High (predicted)	ENSG00000141480	ARRB2	0.0227961	0.502869
TarBase,TargetScan Human	Experimentally Observed,Moderate (predicted)	ENSG00000144848	ATG3	0.00504555	0.631258
TargetScan Human	High (predicted)	ENSG00000136888	ATP6V1G1	0.023412	1.6384
TargetScan Human	High (predicted)	ENSG00000100425	BRD1	0.0385048	0.675577
TargetScan Human	High (predicted)	ENSG00000132640	BTBD3	0.00226695	0.445367
TargetScan Human	High (predicted)	ENSG00000124508	BTN2A2	0.0375586	1.1878
TargetScan Human	High (predicted)	ENSG00000166272	C10orf26	0.00435163	1.9192
TargetScan Human	High (predicted)	ENSG00000185015	CA13	0.0427931	1.42301
TargetScan Human	High (predicted)	ENSG00000198286	CARD11	0.0425179	1.99517
TargetScan Human	High (predicted)	ENSG00000145439	CBR4	0.0124777	1.7406
TargetScan Human	High (predicted)	ENSG00000135218	CD36	0.0015131	0.16045
TarBase,TargetScan Human	Experimentally Observed,High (predicted)	ENSG00000167670	CHAF1A	0.0160087	0.719572
Ingenuity Expert Findings,TargetScan Human	Experimentally Observed,High (predicted)	ENSG00000182578	CSF1R	0.0362716	0.741777
TargetScan Human	High (predicted)	ENSG00000113712	CSNK1A1	0.0408842	0.672748
TarBase	Experimentally Observed	ENSG00000168036	CTNNB1	0.00739526	0.523089
TarBase	Experimentally Observed	ENSG00000158290	CUL4B	0.0185278	1.4907
Ingenuity Expert Findings,TargetScan Human	Experimentally Observed,High (predicted)	ENSG00000160967	CUX1	0.00450434	0.771469
TarBase	Experimentally Observed	ENSG00000001630	CYP51A1	0.0417962	0.799828
TargetScan Human	High (predicted)	ENSG00000150401	DCUN1D2	0.0107738	0.701582
TargetScan Human	High (predicted)	ENSG00000007968	E2F2	0.0029093	0.237757
TargetScan Human	High (predicted)	ENSG00000134698	EIF2C4	0.00590079	0.608802
TargetScan Human	High (predicted)	ENSG00000118985	ELL2	0.0227335	0.566545
TargetScan Human	High (predicted)	ENSG00000116016	EPAS1	0.00997904	0.64544
TargetScan Human	High (predicted)	ENSG00000124491	F13A1	0.0262649	0.312063
TarBase	Experimentally Observed	ENSG00000149485	FADS1		0.777605
TargetScan Human	High (predicted)	ENSG00000145569	FAM105A	0.000955417	0.191435
TargetScan Human	High (predicted)	ENSG00000154511	FAM69A	0.0212255	2.56142
TarBase,TargetScan Human	Experimentally Observed,High (predicted)	ENSG00000197601	FAR1		0.62383
TargetScan Human	High (predicted)	ENSG00000145780	FEM1C	0.00933931	0.615555
TargetScan Human	High (predicted)	ENSG00000170345	FOS	0.0241712	0.447432
TargetScan Human	High (predicted)	ENSG00000114416	FXR1	0.0489587	0.782573
TargetScan Human	High (predicted)	ENSG00000163251	FZD5	0.0018367	0.56031
TargetScan Human	High (predicted)	ENSG00000139112	GABARAPL1		0.59312
TargetScan Human	High (predicted)	ENSG00000187210	GCNT1	0.0113926	0.591988
TarBase,TargetScan Human	Experimentally Observed,High (predicted)	ENSG00000120063	GNA13	0.0181764	0.653153
TargetScan Human	High (predicted)	ENSG00000185477	GPRIN3	0.0063955	0.354478
TargetScan Human	High (predicted)	ENSG00000163754	GYG1	0.000429357	0.267842
TargetScan Human	High (predicted)	ENSG00000147874	HAUS6		0.690131
TargetScan Human	High (predicted)	ENSG00000148634	HERC4	0.0240221	1.71259
TarBase	Experimentally Observed	ENSG00000149084	HSD17B12	0.0484967	0.734224
TargetScan Human	High (predicted)	ENSG00000132465	IGJ	0.013736	0.281768
TargetScan Human,miRecords	Experimentally Observed,High (predicted)	ENSG00000143466	IKBKE	0.0239217	1.24779
TargetScan Human	High (predicted)	ENSG00000132849	INADL	0.0412138	1.47026
TargetScan Human	High (predicted)	ENSG00000168264	IRF2BP2	0.0063955	0.5662
TargetScan Human	High (predicted)	ENSG00000113263	ITK	0.00824504	0.315661
Ingenuity Expert Findings,TargetScan Human,miRecords	Experimentally Observed,High (predicted)	ENSG00000008083	JARID2	0.00428247	0.490531
TargetScan Human	High (predicted)	ENSG00000176595	KBTBD11	0.0448348	0.762182
TargetScan Human	High (predicted)	ENSG00000136636	KCTD3	0.00269982	0.548848
TarBase,TargetScan Human	Experimentally Observed,Moderate (predicted)	ENSG00000014123	KIAA0776	0.027494	0.707329
TargetScan Human	High (predicted)	ENSG00000144320	KIAA1715	0.000429357	0.433371
TargetScan Human	High (predicted)	ENSG00000109787	KLF3	0.00647948	0.357798
TargetScan Human	High (predicted)	ENSG00000114030	KPNA1	0.0324401	0.634606
TargetScan Human	High (predicted)	ENSG00000005893	LAMP2	0.00903024	0.56501
TargetScan Human	High (predicted)	ENSG00000135338	LCA5		0.765111
TargetScan Human	High (predicted)	ENSG00000108829	LRRC59	0.00803675	0.676828
TargetScan Human	High (predicted)	ENSG00000105216	LSM14A	0.0363801	0.814746
TargetScan Human	High (predicted)	ENSG00000204103	MAFB	0.0117149	0.381024
TargetScan Human	High (predicted)	ENSG00000006062	MAP3K14	0.0396532	1.3477
TargetScan Human	High (predicted)	ENSG00000068305	MEF2A	0.00295048	1.52953
TargetScan Human,miRecords	Experimentally Observed,High (predicted)	ENSG00000143995	MEIS1	0.0192811	0.665844
TarBase	Experimentally Observed	ENSG00000186205	MOSC1	0.0198808	0.58139
TargetScan Human,miRecords	Experimentally Observed,High (predicted)	ENSG00000118513	MYB	0.00130538	0.292834
TargetScan Human,miRecords	Experimentally Observed,Moderate (predicted)	ENSG00000172936	MYD88	0.0410025	0.751975
TarBase,TargetScan Human	Experimentally Observed,High (predicted)	ENSG00000134440	NARS	0.00486995	0.590782
TargetScan Human	High (predicted)	ENSG00000173598	NUDT4	0.0256925	0.651068
TargetScan Human	High (predicted)	ENSG00000130703	OSBPL2	0.0246106	0.726919
TargetScan Human	High (predicted)	ENSG00000162734	PEA15	0.042561	1.32074
TargetScan Human	High (predicted)	ENSG00000197121	PGAP1	0.000955417	0.620121
TargetScan Human	High (predicted)	ENSG00000106443	PHF14	0.016928	1.58547
TargetScan Human	High (predicted)	ENSG00000077684	PHF17	0.0173094	0.740635
Ingenuity Expert Findings,TarBase,TargetScan Human	Experimentally Observed,High (predicted)	ENSG00000073921	PICALM	0.0393207	0.666839
TargetScan Human	High (predicted)	ENSG00000145675	PIK3R1	0.00224525	0.3753
TargetScan Human	High (predicted)	ENSG00000115762	PLEKHB2	0.00768762	0.534094
TarBase	Experimentally Observed	ENSG00000004399	PLXND1	0.0330436	0.738765
TarBase	Experimentally Observed	ENSG00000115350	POLE4	0.0271138	1.65705
TarBase,TargetScan Human	Experimentally Observed,High (predicted)	ENSG00000109113	RAB34	0.0444305	0.699273
TargetScan Human	High (predicted)	ENSG00000109756	RAPGEF2	0.0133136	0.559549
TarBase,TargetScan Human	Experimentally Observed,High (predicted)	ENSG00000089902	RCOR1	0.000955417	0.488725
miRecords	Experimentally Observed	ENSG00000137275	RIPK1	0.0111351	0.616774
TargetScan Human	High (predicted)	ENSG00000164068	RNF123	0.0257365	0.61183
TargetScan Human	High (predicted)	ENSG00000163162	RNF149	0.0125121	0.648545
TargetScan Human	High (predicted)	ENSG00000124782	RREB1	0.00701223	0.751347
Ingenuity Expert Findings,TargetScan Human	Experimentally Observed,High (predicted)	ENSG00000182568	SATB1	0.01429	0.505591
TarBase,TargetScan Human	Experimentally Observed,High (predicted)	ENSG00000137575	SDCBP	0.00997626	0.501255
Ingenuity Expert Findings,TargetScan Human	Experimentally Observed,High (predicted)	ENSG00000155926	SLA	0.0343864	0.635415
TarBase	Experimentally Observed	ENSG00000170385	SLC30A1	0.00860807	0.420592
TargetScan Human	High (predicted)	ENSG00000172716	SLFN11	0.0120038	0.614026
TarBase,TargetScan Human	Experimentally Observed,High (predicted)	ENSG00000170365	SMAD1	0.00631726	0.562759
TargetScan Human	High (predicted)	ENSG00000170677	SOCS6	0.00173484	0.517986
TargetScan Human	High (predicted)	ENSG00000115904	SOS1	0.0286317	2.35175
TargetScan Human	High (predicted)	ENSG00000185591	SP1	0.0175892	0.732504
TargetScan Human	High (predicted)	ENSG00000172845	SP3	0.0273804	0.730155
TargetScan Human	High (predicted)	ENSG00000179119	SPTY2D1	0.0257425	0.738741
TarBase	Experimentally Observed	ENSG00000184292	TACSTD2	0.0137029	0.525105
TargetScan Human	High (predicted)	ENSG00000135801	TAF5L	0.0269807	0.762947
TarBase	Experimentally Observed	ENSG00000171530	TBCA	0.0228476	2.13615
Ingenuity Expert Findings	Experimentally Observed	ENSG00000148737	TCF7L2	0.0340565	0.688552
TarBase,miRecords	Experimentally Observed	ENSG00000136404	TM6SF1	0.0405845	0.606512
TargetScan Human	High (predicted)	ENSG00000145779	TNFAIP8	0.0189395	1.8674
TargetScan Human	High (predicted)	ENSG00000083312	TNPO1	0.0351444	0.722082
TarBase,TargetScan Human	Experimentally Observed,High (predicted)	ENSG00000213002	TRAM1
TarBase,TargetScan Human	Experimentally Observed,High (predicted)	ENSG00000071539	TRIP13	0.0029093	0.618907
TargetScan Human	High (predicted)	ENSG00000104447	TRPS1	0.0476527	0.677237
TargetScan Human	High (predicted)	ENSG00000106477	TSGA14	0.0350479	1.24458
TargetScan Human	High (predicted)	ENSG00000108219	TSPAN14	0.00763227	0.450581
TarBase	Experimentally Observed	ENSG00000198431	TXNRD1	0.00865034	0.516564
TarBase	Experimentally Observed	ENSG00000049245	VAMP3	0.00380263	0.576569
TargetScan Human	High (predicted)	ENSG00000132530	XAF1	0.0284496	1.77829
TargetScan Human	High (predicted)	ENSG00000177311	ZBTB38	0.0247084	1.39846
TargetScan Human	High (predicted)	ENSG00000198105	ZNF248	0.00460507	1.6223
TargetScan Human	High (predicted)	ENSG00000182986	ZNF320	0.0110736	1.55172
TargetScan Human	High (predicted)	ENSG00000167555	ZNF528/ZNF880		1.171
TargetScan Human	High (predicted)	ENSG00000188171	ZNF626	0.00797378	1.75406
TargetScan Human	High (predicted),Moderate (predicted)	ENSG00000197937	ZNF665 (includes others)		1.85
TargetScan Human	High (predicted)	ENSG00000160352	ZNF714	0.0291673	1.47882
hsa-mir-15a	R fold= 0.492
Source	Confidence	ID	Symbol	q#value	R#fold
TargetScan Human	High (predicted)	ENSG00000138443	ABI2	0.0136402	1.66812
TarBase	Experimentally Observed	ENSG00000134575	ACP2	0.0248995	0.793522
TargetScan Human	High (predicted)	ENSG00000068366	ACSL4	0.0206337	0.793209
TargetScan Human,miRecords	Experimentally Observed,High (predicted)	ENSG00000138107	ACTR1A	0.0239712	0.677849
TargetScan Human	High (predicted)	ENSG00000169252	ADRB2	0.0103611	1.66054
TargetScan Human	High (predicted)	ENSG00000100077	ADRBK2	0.026397	1.71057
TarBase	Experimentally Observed	ENSG00000035687	ADSS	0.0015131	0.655862
TargetScan Human	High (predicted)	ENSG00000106351	AGFG2		1.241
TargetScan Human	High (predicted)	ENSG00000023516	AKAP11	0.0268675	1.64805
miRecords	Experimentally Observed	ENSG00000166295	ANAPC16		2.206
TargetScan Human	High (predicted)	ENSG00000011426	ANLN	0.000955417	0.19665
TargetScan Human	High (predicted)	ENSG00000196961	AP2A1	0.0390528	0.578326
TargetScan Human	High (predicted)	ENSG00000149182	ARFGAP2	0.0239532	0.688222
TargetScan Human	High (predicted)	ENSG00000131089	ARHGEF9	0.0031483	1.82814
TargetScan Human	High (predicted)	ENSG00000138175	ARL3	0.0152855	1.65568
TargetScan Human	High (predicted)	ENSG00000140450	ARRDC4	0.0133136	0.375177
TargetScan Human	High (predicted)	ENSG00000198363	ASPH	0.0143877	0.749579
miRecords	Experimentally Observed	ENSG00000143970	ASXL2	0.0185278	1.85768
TargetScan Human	High (predicted)	ENSG00000175224	ATG13		0.740192
TargetScan Human	High (predicted)	ENSG00000126775	ATG14		0.684463
TarBase,TargetScan Human	Experimentally Observed,High (predicted)	ENSG00000198925	ATG9A	0.00590079	0.615849
TargetScan Human	High (predicted)	ENSG00000133657	ATP13A3	0.00248637	0.572664
TargetScan Human	High (predicted)	ENSG00000147416	ATP6V1B2	0.0230157	0.585009
TargetScan Human	High (predicted)	ENSG00000204842	ATXN2	0.0115707	1.67368
Ingenuity Expert Findings,TarBase,TargetScan Human,miRecords	Experimentally Observed,High (predicted)	ENSG00000171791	BCL2	0.0310091	2.13244
TargetScan Human	High (predicted)	ENSG00000107779	BMPR1A	0.0231065	2.70336
TargetScan Human	High (predicted)	ENSG00000171634	BPTF		1.543
TargetScan Human	High (predicted)	ENSG00000160058	BSDC1	0.00543476	0.649671
TargetScan Human	High (predicted)	ENSG00000186265	BTLA	0.0163451	2.95276
TargetScan Human	High (predicted)	ENSG00000082153	BZW1	0.0223778	0.602289
TarBase	Experimentally Observed	ENSG00000143443	C1orf56	0.0310591	1.21892
TargetScan Human	High (predicted)	ENSG00000094975	C1orf9	0.00172144	0.528886
TargetScan Human	High (predicted)	ENSG00000115998	C2orf42	0.0364995	1.33064
miRecords	Experimentally Observed	ENSG00000118961	C2orf43	0.0198438	2.04334
TargetScan Human	High (predicted)	ENSG00000157693	C9orf91	0.0148296	2.46214
TargetScan Human,miRecords	Experimentally Observed,High (predicted)	ENSG00000135387	CAPRIN1	0.0364191	0.777457
TargetScan Human	High (predicted)	ENSG00000198898	CAPZA2	0.0346844	0.699764
miRecords	Experimentally Observed	ENSG00000105483	CARD8	0.016028	1.70631
miRecords	Experimentally Observed	ENSG00000164306	CCDC111	0.00931804	1.56543
TargetScan Human,miRecords	Experimentally Observed,High (predicted)	ENSG00000105173	CCNE1	0.00438682	0.450566
TargetScan Human	High (predicted)	ENSG00000177575	CD163	0.00512235	0.446151
TargetScan Human	High (predicted)	ENSG00000178562	CD28	0.0519524	0.565122
TargetScan Human	High (predicted)	ENSG00000079335	CDC14A	0.0015095	0.588378
TargetScan Human	High (predicted)	ENSG00000094880	CDC23	0.0160574	0.629035
TargetScan Human	High (predicted)	ENSG00000164045	CDC25A	0.00269982	0.396902
TargetScan Human	High (predicted)	ENSG00000101224	CDC25B	0.0390528	1.77159
TargetScan Human	High (predicted)	ENSG00000004897	CDC27	0.0503061	0.774277
TargetScan Human	High (predicted)	ENSG00000170779	CDCA4	0.00201495	0.346042
TargetScan Human	High (predicted)	ENSG00000059758	CDK17		0.637755
TargetScan Human,miRecords	Experimentally Observed,High (predicted)	ENSG00000105810	CDK6	0.000429357	0.226511
TargetScan Human	High (predicted)	ENSG00000086548	CEACAM1 (includes others)		0.103767
TargetScan Human	High (predicted)	ENSG00000149554	CHEK1	0.00224932	0.446346
TargetScan Human	High (predicted)	ENSG00000204116	CHIC1	0.0309059	1.28271
TargetScan Human,miRecords	Experimentally Observed,High (predicted)	ENSG00000157224	CLDN12	0.0044791	0.660173
TargetScan Human	High (predicted)	ENSG00000137449	CPEB2	0.00616431	0.713659
TargetScan Human	High (predicted)	ENSG00000107864	CPEB3	0.00438682	1.62509
miRecords	Experimentally Observed	ENSG00000111269	CREBL2	0.0228476	2.13636
miRecords	Experimentally Observed	ENSG00000145708	CRHBP	0.0181158	0.726145
TargetScan Human	High (predicted)	ENSG00000099942	CRKL	0.00173134	0.745192
TargetScan Human	High (predicted)	ENSG00000144677	CTDSPL	0.00842892	0.485969
TargetScan Human	High (predicted)	ENSG00000162144	CYBASC3	0.0191234	2.62911
TargetScan Human	High (predicted)	ENSG00000181192	DHTKD1	0.00392108	1.98275
TargetScan Human	High (predicted)	ENSG00000131504	DIAPH1	0.0156196	0.747356
TargetScan Human	High (predicted)	ENSG00000119689	DLST		0.598802
TargetScan Human	High (predicted)	ENSG00000170946	DNAJC24		1.733
TargetScan Human	High (predicted)	ENSG00000135720	DYNC1LI2	0.0117245	0.604605
TargetScan Human,miRecords	Experimentally Observed,High (predicted)	ENSG00000112242	E2F3	0.0246106	0.671815
TargetScan Human	High (predicted)	ENSG00000119718	EIF2B2	0.0180047	0.776792
TargetScan Human	High (predicted)	ENSG00000145191	EIF2B5	0.00875815	0.613954
TargetScan Human	High (predicted)	ENSG00000134698	EIF2C4	0.00590079	0.608802
TargetScan Human	High (predicted)	ENSG00000118985	ELL2	0.0227335	0.566545
TargetScan Human	High (predicted)	ENSG00000062598	ELMO2	0.0247524	0.59797
TargetScan Human	High (predicted)	ENSG00000138018	EPT1		0.625
TargetScan Human	High (predicted)	ENSG00000139163	ETNK1	0.0180938	1.95392
TargetScan Human	High (predicted)	ENSG00000183688	FAM101B	0.0111105	0.233737
TargetScan Human,miRecords	Experimentally Observed,Moderate (predicted)	ENSG00000156500	FAM122C	0.00778241	1.58566
TargetScan Human	High (predicted)	ENSG00000151553	FAM160B1		0.533333
TargetScan Human	High (predicted)	ENSG00000128923	FAM63B	0.00800979	1.8846
TargetScan Human	High (predicted)	ENSG00000111913	FAM65B		2.088
miRecords	Experimentally Observed	ENSG00000154511	FAM69A	0.0212255	2.56142
TargetScan Human	High (predicted)	ENSG00000176853	FAM91A1	0.0180565	0.58692
TargetScan Human	High (predicted)	ENSG00000137460	FHDC1	0.0272641	0.371182
TarBase,TargetScan Human	Experimentally Observed,High (predicted)	ENSG00000075420	FNDC3B	0.00293295	0.422624
TargetScan Human	High (predicted)	ENSG00000052795	FNIP2	0.00445666	0.392581
TargetScan Human	High (predicted)	ENSG00000073910	FRY	0.0250211	2.53186
TargetScan Human	High (predicted)	ENSG00000140564	FURIN	0.0154817	0.493093
TargetScan Human	High (predicted)	ENSG00000139112	GABARAPL1		0.59312
TargetScan Human	High (predicted)	ENSG00000141429	GALNT1	0.0239712	0.728693
TarBase,TargetScan Human	Experimentally Observed,Moderate (predicted)	ENSG00000198380	GFPT1	0.0125065	0.615713
TargetScan Human	High (predicted)	ENSG00000173221	GLRX	0.00438682	0.304965
TargetScan Human	High (predicted)	ENSG00000135423	GLS2	0.0314366	1.45685
TargetScan Human	High (predicted)	ENSG00000151948	GLT1D1	0.0436004	0.530166
TargetScan Human	High (predicted)	ENSG00000065135	GNAI3	0.00747542	0.543116
TargetScan Human	High (predicted)	ENSG00000106070	GRB10	0.05241	0.767128
miRecords	Experimentally Observed	ENSG00000110768	GTF2H1	0.0386822	1.47637
TargetScan Human	High (predicted)	ENSG00000100226	GTPBP1	0.0181814	0.630077
TargetScan Human	High (predicted)	ENSG00000165905	GYLTL1B	0.0169701	1.48836
TarBase	Experimentally Observed	ENSG00000170445	HARS	0.0371109	0.725635
TargetScan Human	High (predicted)	ENSG00000143321	HDGF	0.000952964	0.395905
TargetScan Human	High (predicted)	ENSG00000181061	HIGD1A	0.0471197	0.724539
TargetScan Human	High (predicted)	ENSG00000100281	HMGXB4		0.677966
miRecords	Experimentally Observed	ENSG00000166598	HSP90B1	0.0434277	0.71023
TarBase	Experimentally Observed	ENSG00000186792	HYAL3	0.0381341	0.773567
TarBase,TargetScan Human	Experimentally Observed,High (predicted)	ENSG00000197081	IGF2R	0.0129284	0.697644
TargetScan Human	High (predicted)	ENSG00000127080	IPPK	0.0358658	0.776475
TargetScan Human	High (predicted)	ENSG00000137265	IRF4	0.0499441	0.565092
TargetScan Human	High (predicted)	ENSG00000169047	IRS1	0.0229774	1.48524
TargetScan Human	High (predicted)	ENSG00000116679	IVNS1ABP	0.00378075	0.296544
TargetScan Human	High (predicted)	ENSG00000008083	JARID2	0.00428247	0.490531
TargetScan Human	High (predicted)	ENSG00000107104	KANK1	0.0370499	1.37594
TargetScan Human	High (predicted)	ENSG00000140854	KATNB1	0.0267823	0.819442
TarBase,TargetScan Human	Experimentally Observed,High (predicted)	ENSG00000104783	KCNN4	0.0215538	2.04795
TargetScan Human	High (predicted)	ENSG00000119537	KDSR		0.749064
TargetScan Human	High (predicted)	ENSG00000182149	KIAA0174	0.0333185	0.64333
TargetScan Human	High (predicted)	ENSG00000119682	KIAA0317	0.00286662	0.556664
TargetScan Human	High (predicted)	ENSG00000137807	KIF23	0.00590079	0.291623
TargetScan Human	High (predicted)	ENSG00000101350	KIF3B	0.0255465	1.25571
TargetScan Human	High (predicted)	ENSG00000114648	KLHL18	0.0338545	0.672983
TargetScan Human	High (predicted)	ENSG00000114030	KPNA1	0.0324401	0.634606
TarBase,TargetScan Human	Experimentally Observed,High (predicted)	ENSG00000102753	KPNA3	0.00568736	0.522393
TarBase,TargetScan Human	Experimentally Observed,Moderate (predicted)	ENSG00000109270	LAMTOR3		0.706215
TargetScan Human	High (predicted)	ENSG00000150457	LATS2	0.0442107	0.683676
TargetScan Human	High (predicted)	ENSG00000145012	LPP	0.00600685	1.94234
TargetScan Human	High (predicted)	ENSG00000144749	LRIG1	0.0246106	0.661925
TargetScan Human	High (predicted)	ENSG00000154237	LRRK1	0.00923651	1.74151
TargetScan Human,miRecords	Experimentally Observed,High (predicted)	ENSG00000169032	MAP2K1	0.0356764	0.678972
TargetScan Human	High (predicted)	ENSG00000101367	MAPRE1	0.0232655	0.693819
TargetScan Human	High (predicted)	ENSG00000141644	MBD1	0.0246982	0.774742
miRecords	Experimentally Observed	ENSG00000143384	MCL1	0.0055235	0.570002
TargetScan Human	High (predicted)	ENSG00000116688	MFN2	0.00133474	0.508632
TargetScan Human	High (predicted)	ENSG00000071073	MGAT4A	0.0158109	0.553226
TargetScan Human	High (predicted)	ENSG00000119684	MLH3	0.0221502	1.23633
TargetScan Human	High (predicted)	ENSG00000108292	MLLT6	0.0327303	1.26533
TargetScan Human	High (predicted)	ENSG00000120162	MOBKL2B	0.0201468	0.785919
TargetScan Human	High (predicted)	ENSG00000099810	MTAP	0.00568736	1.38447
TargetScan Human	High (predicted)	ENSG00000100330	MTMR3	0.00173134	0.528478
TargetScan Human	High (predicted)	ENSG00000179820	MYADM	0.0181814	0.428617
TargetScan Human,miRecords	Experimentally Observed,High (predicted)	ENSG00000118513	MYB	0.00130538	0.292834
TargetScan Human	High (predicted)	ENSG00000107130	NCS1		0.691563
TargetScan Human	High (predicted)	ENSG00000165802	NELF	0.0396047	0.785847
miRecords	Experimentally Observed	ENSG00000162599	NFIA	0.00616431	0.483964
miRecords	Experimentally Observed	ENSG00000104361	NIPAL2		1.959
TarBase	Experimentally Observed	ENSG00000113389	NPR3	0.0182589	0.69654
TargetScan Human	High (predicted)	ENSG00000093000	NUP50	0.0103611	0.738175
TargetScan Human	High (predicted)	ENSG00000122126	OCRL	0.010871	0.640408
miRecords	Experimentally Observed	ENSG00000128694	OSGEPL1		1.587
TarBase	Experimentally Observed	ENSG00000168092	PAFAH1B2	0.0489205	0.81551
TargetScan Human	High (predicted)	ENSG00000076641	PAG1	0.00375492	0.326238
TargetScan Human	High (predicted)	ENSG00000090097	PCBP4	0.0362922	1.21083
TargetScan Human	High (predicted)	ENSG00000143870	PDIA6	0.00466662	0.461284
TargetScan Human	High (predicted)	ENSG00000175087	PDIK1L	0.000996722	0.589879
TargetScan Human	High (predicted)	ENSG00000004799	PDK4	0.0228027	0.675511
TargetScan Human	High (predicted)	ENSG00000114268	PFKFB4	0.0183641	0.620598
TargetScan Human	High (predicted)	ENSG00000135365	PHF21A	0.00733799	1.65124
TargetScan Human	High (predicted)	ENSG00000145675	PIK3R1	0.00224525	0.3753
TarBase	Experimentally Observed	ENSG00000166851	PLK1	0.00434024	0.351945
TargetScan Human	High (predicted)	ENSG00000114698	PLSCR4	0.0354075	0.812343
miRecords	Experimentally Observed	ENSG00000064933	PMS1	0.0299608	1.58978
TarBase,TargetScan Human	Experimentally Observed,Moderate (predicted)	ENSG00000198805	PNP		0.212766
TargetScan Human	High (predicted)	ENSG00000132664	POLR3F	0.000610492	0.631034
TargetScan Human	High (predicted)	ENSG00000067113	PPAP2A	0.038671	1.41506
TargetScan Human	High (predicted)	ENSG00000162407	PPAP2B	0.0386661	0.59376
TarBase,TargetScan Human	Experimentally Observed,High (predicted)	ENSG00000108179	PPIF	0.0403065	0.602962
TargetScan Human	High (predicted)	ENSG00000111110	PPM1H	0.00733197	0.708373
TargetScan Human	High (predicted)	ENSG00000137713	PPP2R1B	0.00497028	0.616602
TargetScan Human	High (predicted)	ENSG00000119414	PPP6C	0.0289145	0.630549
TargetScan Human	High (predicted)	ENSG00000114302	PRKAR2A	0.0177939	0.642655
TargetScan Human	High (predicted)	ENSG00000134748	PRPF38A	0.00423093	0.660052
TargetScan Human	High (predicted)	ENSG00000103035	PSMD7	0.0500996	0.764132
TarBase,TargetScan Human	Experimentally Observed,High (predicted)	ENSG00000185129	PURA	0.0290147	1.65435
TargetScan Human	High (predicted)	ENSG00000110400	PVRL1	0.0145754	0.677617
TargetScan Human	High (predicted)	ENSG00000112531	QKI	0.0295451	0.712607
TargetScan Human	High (predicted)	ENSG00000127328	RAB3IP	0.0387017	1.17727
TargetScan Human	High (predicted)	ENSG00000161800	RACGAP1	0.00152522	0.29883
TargetScan Human	High (predicted)	ENSG00000132155	RAF1	0.00438682	0.500544
TargetScan Human	High (predicted)	ENSG00000109756	RAPGEF2	0.0133136	0.559549
TargetScan Human	High (predicted)	ENSG00000138670	RASGEF1B	0.0375586	0.568996
TargetScan Human	High (predicted)	ENSG00000136653	RASSF5	0.0229473	0.700152
TargetScan Human	High (predicted)	ENSG00000168411	RFWD3	0.0078122	0.484328
miRecords	Experimentally Observed	ENSG00000135828	RNASEL	0.0397106	1.42344
TargetScan Human	High (predicted)	ENSG00000134758	RNF138	0.0343244	0.753722
TargetScan Human	High (predicted)	ENSG00000146373	RNF217	0.00250097	0.588863
TargetScan Human	High (predicted)	ENSG00000108375	RNF43	0.0228316	1.31881
TargetScan Human	High (predicted)	ENSG00000155876	RRAGA	0.0381341	1.26047
TargetScan Human	High (predicted)	ENSG00000183576	SETD3	0.0525813	0.783904
TargetScan Human	High (predicted)	ENSG00000118515	SGK1	0.00478656	0.316657
TargetScan Human	High (predicted)	ENSG00000110911	SLC11A2	0.00466251	0.532638
TargetScan Human	High (predicted)	ENSG00000074621	SLC24A1	0.0358746	1.39469
TargetScan Human	High (predicted)	ENSG00000173262	SLC2A14	0.0240533	0.597184
TargetScan Human	High (predicted)	ENSG00000059804	SLC2A3	0.020181	0.50187
TarBase	Experimentally Observed	ENSG00000017483	SLC38A5	0.00923332	0.491919
TarBase,TargetScan Human	Experimentally Observed,Moderate (predicted)	ENSG00000139514	SLC7A1	0.0238671	0.64465
TargetScan Human	High (predicted)	ENSG00000198689	SLC9A6	0.0250211	0.720086
TargetScan Human	High (predicted)	ENSG00000197818	SLC9A8	0.051287	0.687242
TargetScan Human	High (predicted)	ENSG00000166949	SMAD3	0.0185178	0.487724
TargetScan Human	High (predicted)	ENSG00000198742	SMURF1	0.0390528	0.537666
TargetScan Human	High (predicted)	ENSG00000163788	SNRK	0.00943184	0.589309
TargetScan Human	High (predicted)	ENSG00000170677	SOCS6	0.00173484	0.517986
TargetScan Human	High (predicted)	ENSG00000134243	SORT1	0.000429357	0.237674
TargetScan Human	High (predicted)	ENSG00000115904	SOS1	0.0286317	2.35175
TargetScan Human	High (predicted)	ENSG00000179119	SPTY2D1	0.0257425	0.738741
TarBase	Experimentally Observed	ENSG00000161011	SQSTM1	0.0296896	0.618163
TargetScan Human	High (predicted)	ENSG00000096063	SRPK1	0.00540374	0.635071
TarBase,TargetScan Human	Experimentally Observed,High (predicted)	ENSG00000182934	SRPR	0.0051634	0.646095
TarBase,TargetScan Human	Experimentally Observed,High (predicted)	ENSG00000144867	SRPRB	0.0218109	0.68232
TargetScan Human	High (predicted)	ENSG00000124783	SSR1	0.00933931	0.649421
TargetScan Human	High (predicted)	ENSG00000116266	STXBP3	0.00988435	0.738091
TargetScan Human	High (predicted)	ENSG00000184900	SUMO3	0.00687857	0.707534
TargetScan Human	High (predicted)	ENSG00000092201	SUPT16H	0.00930121	0.705032
TargetScan Human	High (predicted)	ENSG00000159082	SYNJ1	0.00414519	0.421948
TargetScan Human	High (predicted)	ENSG00000006114	SYNRG		2.061
TargetScan Human	High (predicted)	ENSG00000157625	TAB3		0.789889
TargetScan Human	High (predicted)	ENSG00000147526	TACC1	0.0370618	0.734342
TargetScan Human	High (predicted)	ENSG00000139546	TARBP2	0.00754872	1.31615
TargetScan Human	High (predicted)	ENSG00000187605	TET3	0.00430449	0.626591
TargetScan Human	High (predicted)	ENSG00000172765	TMCC1	0.0196903	1.62257
TargetScan Human	High (predicted)	ENSG00000170006	TMEM154	0.00164166	2.11313
TargetScan Human	High (predicted)	ENSG00000205269	TMEM170B		0.271223
TargetScan Human	High (predicted)	ENSG00000155099	TMEM55A	0.0502705	0.580546
TargetScan Human	High (predicted)	ENSG00000103978	TMEM87A	0.0391492	0.712181
TargetScan Human	High (predicted)	ENSG00000213002	TRAM1		5.178
TargetScan Human	High (predicted)	ENSG00000168016	TRANK1		1.941
TargetScan Human	High (predicted)	ENSG00000165006	UBAP1	0.0209305	0.614879
TarBase	Experimentally Observed	ENSG00000108106	UBE2S	0.0301774	2.88102
TargetScan Human	High (predicted)	ENSG00000162543	UBXN10		0.691085
Ingenuity Expert Findings,TargetScan Human	Experimentally Observed,High (predicted)	ENSG00000175567	UCP2	0.0279123	1.64226
TargetScan Human	High (predicted)	ENSG00000101557	USP14	0.00619163	0.611084
TargetScan Human	High (predicted)	ENSG00000135655	USP15	0.0340565	0.723418
TargetScan Human	High (predicted)	ENSG00000106346	USP42	0.00799658	0.715179
TargetScan Human	High (predicted)	ENSG00000124333	VAMP7	0.00588522	0.572483
TargetScan Human	High (predicted)	ENSG00000035403	VCL	0.00382077	0.46088
TargetScan Human,miRecords	Experimentally Observed,High (predicted)	ENSG00000112715	VEGFA		0.686342
TargetScan Human	High (predicted)	ENSG00000184056	VPS33B	0.00581798	0.698562
TargetScan Human	High (predicted)	ENSG00000106299	WASL	0.00658236	0.783864
TargetScan Human	High (predicted)	ENSG00000085433	WDR47	0.00497028	0.705922
TargetScan Human	High (predicted)	ENSG00000109685	WHSC1	0.00303763	0.601184
TargetScan Human	High (predicted)	ENSG00000130227	XPO7	0.00699032	0.464809
TargetScan Human	High (predicted)	ENSG00000143324	XPR1	0.0296194	0.751553
TargetScan Human	High (predicted)	ENSG00000180667	YOD1	0.00239736	0.470311
TargetScan Human	High (predicted)	ENSG00000091436	ZAK		0.706714
TargetScan Human	High (predicted)	ENSG00000102053	ZC3H12B	0.0334529	2.15267
TargetScan Human	High (predicted)	ENSG00000149289	ZC3H12C	0.0231515	0.630042
TargetScan Human	High (predicted)	ENSG00000123200	ZC3H13	0.0313082	1.27082
TargetScan Human	High (predicted)	ENSG00000188177	ZC3H6	0.00973004	1.45723
TargetScan Human	High (predicted)	ENSG00000131381	ZFYVE20	0.0425431	0.81518
TargetScan Human	High (predicted)	ENSG00000165244	ZNF367	0.00478656	0.464425
TargetScan Human	High (predicted)	ENSG00000074657	ZNF532	0.0257561	1.61196
miRecords	Experimentally Observed	ENSG00000188321	ZNF559	0.036433	2.0814
TargetScan Human	High (predicted)	ENSG00000180357	ZNF609	0.017647	1.54595
TargetScan Human	High (predicted)	ENSG00000197779	ZNF81	0.00701223	1.43304
TargetScan Human	High (predicted)	ENSG00000124203	ZNF831	0.0184126	1.9213
TargetScan Human	High (predicted)	ENSG00000132801	ZSWIM3	0.0153528	1.30717
Ingenuity Expert Findings	Experimentally Observed	ENSG00000159840	ZYX	0.0147392	0.510515
hsa-mir-204	R fold= 0.569
Source	Confidence	ID	Symbol	q#value	R#fold
TargetScan Human	High (predicted)	ENSG00000115977	AAK1	0.00273113	0.508134
TargetScan Human	High (predicted)	ENSG00000068366	ACSL4	0.0206337	0.793209
TargetScan Human	High (predicted)	ENSG00000153207	AHCTF1		0.645995
TargetScan Human	High (predicted)	ENSG00000071205	ARHGAP10	0.00581798	0.702261
TargetScan Human	High (predicted)	ENSG00000145819	ARHGAP26	0.0422724	0.679823
TargetScan Human	High (predicted)	ENSG00000134108	ARL8B	0.00626392	0.559639
TargetScan Human	High (predicted)	ENSG00000162174	ASRGL1	0.0401557	0.749992
TargetScan Human	High (predicted)	ENSG00000124788	ATXN1	0.0381341	1.66251
miRecords	Experimentally Observed	ENSG00000178999	AURKB	0.0149096	0.554562
TargetScan Human	High (predicted)	ENSG00000176597	B3GNT5	0.0125605	0.347074
TargetScan Human	High (predicted)	ENSG00000171791	BCL2	0.0310091	2.13244
TargetScan Human	High (predicted)	ENSG00000110330	BIRC2	0.0509299	0.682275
TargetScan Human	High (predicted)	ENSG00000107779	BMPR1A	0.0231065	2.70336
TargetScan Human	High (predicted)	ENSG00000148655	C10orf11	0.00775465	0.691773
TargetScan Human	High (predicted)	ENSG00000136122	C13orf34	0.0136211	0.741002
TargetScan Human	High (predicted)	ENSG00000129480	C14orf126	0.0125065	1.74149
TargetScan Human	High (predicted)	ENSG00000214046	C19orf42	0.0170061	1.71616
TargetScan Human	High (predicted)	ENSG00000215494	C2CD2		2.108
TargetScan Human	High (predicted)	ENSG00000156172	C8orf37	0.00444964	1.57063
TargetScan Human	High (predicted)	ENSG00000145349	CAMK2D	0.0395742	1.88593
TargetScan Human	High (predicted)	ENSG00000135387	CAPRIN1	0.0364191	0.777457
TargetScan Human	High (predicted)	ENSG00000147144	CCDC120	0.0415262	1.12818
TargetScan Human	High (predicted)	ENSG00000102543	CDADC1	0.0107959	0.621271
TargetScan Human	High (predicted)	ENSG00000079335	CDC14A	0.0015095	0.588378
TargetScan Human,miRecords	Experimentally Observed,High (predicted)	ENSG00000101224	CDC25B	0.0390528	1.77159
TargetScan Human	High (predicted)	ENSG00000097046	CDC7 (includes EG:12545)		0.628141
TargetScan Human	High (predicted)	ENSG00000058091	CDK14		2.232
TargetScan Human	High (predicted)	ENSG00000086548	CEACAM1 (includes others)		0.103767
TargetScan Human	High (predicted)	ENSG00000187446	CHP		0.662252
TargetScan Human	High (predicted)	ENSG00000090269	CLEC5A	0.00423093	0.32449
TargetScan Human	High (predicted)	ENSG00000141367	CLTC	0.00172144	0.513933
TargetScan Human	High (predicted)	ENSG00000164237	CMBL	0.0193508	0.744864
TargetScan Human	High (predicted)	ENSG00000110880	CORO1C	0.00423093	0.473301
TargetScan Human	High (predicted)	ENSG00000096006	CRISP3	0.00387254	0.133394
TargetScan Human	High (predicted)	ENSG00000099942	CRKL	0.00173134	0.745192
TargetScan Human	High (predicted)	ENSG00000170275	CRTAP	0.0428102	0.717518
TargetScan Human,miRecords	Experimentally Observed,Moderate (predicted)	ENSG00000109861	CTSC	0.0228316	0.635417
TargetScan Human	High (predicted)	ENSG00000095485	CWF19L1	0.0298306	0.684079
TargetScan Human	High (predicted)	ENSG00000165168	CYBB	0.00427117	0.274723
TargetScan Human	High (predicted)	ENSG00000140829	DHX38	0.0367265	0.790958
TargetScan Human	High (predicted)	ENSG00000175550	DRAP1	0.0410713	1.44968
TargetScan Human	High (predicted)	ENSG00000144597	EAF1	0.023549	0.677964
TargetScan Human	High (predicted)	ENSG00000118985	ELL2	0.0227335	0.566545
TargetScan Human	High (predicted)	ENSG00000170522	ELOVL6	0.021003	0.675337
TargetScan Human	High (predicted)	ENSG00000106123	EPHB6	0.0329989	1.10784
TargetScan Human	High (predicted)	ENSG00000138018	EPT1		0.625
TargetScan Human	High (predicted)	ENSG00000171320	ESCO2	0.00398988	0.373362
TargetScan Human	High (predicted)	ENSG00000117868	ESYT2		0.686813
TargetScan Human	High (predicted)	ENSG00000065809	FAM107B	0.0265519	0.71361
TargetScan Human	High (predicted)	ENSG00000138439	FAM117B		1.645
TargetScan Human	High (predicted)	ENSG00000196814	FAM125B	0.0264109	0.654117
TargetScan Human	High (predicted)	ENSG00000051009	FAM160A2		0.533333
TargetScan Human	High (predicted)	ENSG00000152102	FAM168B		0.746826
TargetScan Human	High (predicted)	ENSG00000165660	FAM175B		0.679348
TargetScan Human	High (predicted)	ENSG00000112773	FAM46A	0.0022918	0.296119
TargetScan Human,miRecords	Experimentally Observed,High (predicted)	ENSG00000138829	FBN2	0.00290515	0.514842
TargetScan Human	High (predicted)	ENSG00000112146	FBXO9	0.00687392	0.647586
TargetScan Human	High (predicted)	ENSG00000108592	FTSJ3	0.0401024	0.777967
TargetScan Human	High (predicted)	ENSG00000165219	GAPVD1	0.00688082	0.691614
TargetScan Human	High (predicted)	ENSG00000157259	GATAD1	0.0159489	1.45219
TargetScan Human	High (predicted)	ENSG00000159592	GPBP1L1	0.00568736	0.745249
TargetScan Human	High (predicted)	ENSG00000075240	GRAMD4	0.0154586	0.671571
TargetScan Human	High (predicted)	ENSG00000172986	GXYLT2		0.4662
TargetScan Human	High (predicted)	ENSG00000159267	HLCS	0.0269807	1.68774
TargetScan Human	High (predicted)	ENSG00000071794	HLTF	0.0364493	0.624908
TargetScan Human	High (predicted)	ENSG00000197081	IGF2R	0.0129284	0.697644
TargetScan Human	High (predicted)	ENSG00000168685	IL7R	0.0424131	0.366773
TargetScan Human	High (predicted)	ENSG00000184903	IMMP2L	0.00697558	3.32774
TargetScan Human	High (predicted)	ENSG00000168264	IRF2BP2	0.0063955	0.5662
TargetScan Human	High (predicted)	ENSG00000096968	JAK2	0.0437299	1.64966
TargetScan Human	High (predicted)	ENSG00000008083	JARID2	0.00428247	0.490531
TargetScan Human	High (predicted)	ENSG00000112078	KCTD20	0.0319615	0.723028
TargetScan Human	High (predicted)	ENSG00000014123	KIAA0776	0.027494	0.707329
TargetScan Human	High (predicted)	ENSG00000109787	KLF3	0.00647948	0.357798
TargetScan Human	High (predicted)	ENSG00000172292	LASS6	0.0209125	0.483274
TargetScan Human	High (predicted)	ENSG00000066557	LRRC40	0.0370974	0.67355
TargetScan Human	High (predicted)	ENSG00000197063	MAFG	0.00600061	0.562897
TargetScan Human	High (predicted)	ENSG00000173926	MARCH3		-1,600
TargetScan Human	High (predicted)	ENSG00000143384	MCL1	0.0055235	0.570002
TargetScan Human	High (predicted)	ENSG00000143995	MEIS1	0.0192811	0.665844
TargetScan Human	High (predicted)	ENSG00000164024	METAP1	0.0295451	0.680636
TargetScan Human	High (predicted)	ENSG00000128268	MGAT3	0.0117149	0.579162
TargetScan Human	High (predicted)	ENSG00000171843	MLLT3	0.0209215	0.647648
TargetScan Human	High (predicted)	ENSG00000139505	MTMR6	0.0175917	0.44443
TargetScan Human	High (predicted)	ENSG00000120279	MYCT1	0.0268141	0.803531
TargetScan Human	High (predicted)	ENSG00000172915	NBEA	0.0298268	1.58909
TargetScan Human	High (predicted)	ENSG00000148572	NRBF2	0.0359869	0.746448
TargetScan Human	High (predicted)	ENSG00000089041	P2RX7	0.0162984	1.56906
TargetScan Human	High (predicted)	ENSG00000124374	PAIP2B	0.0337039	2.84882
TargetScan Human	High (predicted)	ENSG00000197121	PGAP1	0.000955417	0.620121
TargetScan Human	High (predicted)	ENSG00000137055	PLAA	0.00403756	0.620233
TargetScan Human	High (predicted)	ENSG00000163644	PPM1K	0.0231219	2.01762
TargetScan Human	High (predicted)	ENSG00000136653	RASSF5	0.0229473	0.700152
TargetScan Human	High (predicted)	ENSG00000181826	RELL1	0.00715744	0.389349
TargetScan Human	High (predicted)	ENSG00000054967	RELT	0.0123221	0.698929
TargetScan Human	High (predicted)	ENSG00000142599	RERE	0.0102858	1.56018
TargetScan Human	High (predicted)	ENSG00000164292	RHOBTB3	0.000797378	0.438537
TargetScan Human	High (predicted)	ENSG00000124784	RIOK1	0.0161359	0.674745
TargetScan Human	High (predicted)	ENSG00000120925	RNF170	0.0107959	1.53147
TargetScan Human	High (predicted)	ENSG00000146373	RNF217	0.00250097	0.588863
TargetScan Human	High (predicted)	ENSG00000124813	RUNX2	0.0122166	0.657815
TargetScan Human	High (predicted)	ENSG00000102098	SCML2	0.000498361	0.558591
TargetScan Human	High (predicted)	ENSG00000150961	SEC24D	0.00588522	0.553782
TargetScan Human	High (predicted)	ENSG00000092421	SEMA6A	0.0187696	0.776529
TargetScan Human,miRecords	Experimentally Observed,High (predicted)	ENSG00000160691	SHC1	0.0238109	0.754237
TargetScan Human	High (predicted)	ENSG00000101082	SLA2	0.0279102	0.476859
TargetScan Human	High (predicted)	ENSG00000170482	SLC23A1	0.0371729	1.34492
TargetScan Human	High (predicted)	ENSG00000157800	SLC37A3	0.0133667	0.620504
TargetScan Human	High (predicted)	ENSG00000149150	SLC43A1	0.00172144	0.355085
TargetScan Human	High (predicted)	ENSG00000163798	SLC4A1AP	0.0237971	0.788703
TargetScan Human	High (predicted)	ENSG00000136824	SMC2	0.0306425	0.601795
TargetScan Human	High (predicted)	ENSG00000170677	SOCS6	0.00173484	0.517986
TargetScan Human	High (predicted)	ENSG00000134243	SORT1	0.000429357	0.237674
TargetScan Human	High (predicted)	ENSG00000115904	SOS1	0.0286317	2.35175
TargetScan Human,miRecords	Experimentally Observed,High (predicted)	ENSG00000124766	SOX4	0.0139287	0.749434
TargetScan Human	High (predicted)	ENSG00000185591	SP1	0.0175892	0.732504
miRecords	Experimentally Observed	ENSG00000113140	SPARC	0.0111833	0.430089
TargetScan Human	High (predicted)	ENSG00000114850	SSR3	0.024374	0.638503
TargetScan Human	High (predicted)	ENSG00000149136	SSRP1	0.0505105	0.791317
TargetScan Human	High (predicted)	ENSG00000170921	TANC2	0.0115707	0.484854
TargetScan Human	High (predicted)	ENSG00000106799	TGFBR1	0.0136211	0.587427
TargetScan Human	High (predicted)	ENSG00000135926	TMBIM1	0.0139846	0.480792
TargetScan Human	High (predicted)	ENSG00000146433	TMEM181	0.0174367	0.686824
TargetScan Human	High (predicted)	ENSG00000198846	TOX	0.0309281	5.05197
TargetScan Human	High (predicted)	ENSG00000104447	TRPS1	0.0476527	0.677237
TargetScan Human	High (predicted)	ENSG00000198431	TXNRD1	0.00865034	0.516564
TargetScan Human	High (predicted)	ENSG00000107341	UBE2R2	0.0362138	1.44463
TargetScan Human	High (predicted)	ENSG00000101557	USP14	0.00619163	0.611084
TargetScan Human	High (predicted)	ENSG00000048028	USP28	0.0348691	1.60076
TargetScan Human	High (predicted)	ENSG00000170242	USP47	0.0519524	0.710267
TargetScan Human	High (predicted)	ENSG00000178201	VN1R1	0.0181512	1.86666
TargetScan Human	High (predicted)	ENSG00000129003	VPS13C	0.017763	1.82562
TargetScan Human	High (predicted)	ENSG00000163625	WDFY3	0.0373132	0.632673
TargetScan Human	High (predicted)	ENSG00000198554	WDHD1	0.00398988	0.623479
TargetScan Human	High (predicted)	ENSG00000162923	WDR26	0.0529679	0.704832
TargetScan Human	High (predicted)	ENSG00000047644	WWC3	0.0137674	1.62823
TargetScan Human	High (predicted)	ENSG00000134684	YARS	0.0409819	0.596158
TargetScan Human	High (predicted)	ENSG00000166793	YPEL4	0.0313408	0.485841
TargetScan Human	High (predicted)	ENSG00000155329	ZCCHC10	0.0126096	2.08929
TargetScan Human	High (predicted)	ENSG00000140948	ZCCHC14	0.0289145	0.805364
TargetScan Human	High (predicted)	ENSG00000131381	ZFYVE20	0.0425431	0.81518
TargetScan Human	High (predicted)	ENSG00000101040	ZMYND8	0.0299546	1.76215
TargetScan Human	High (predicted)	ENSG00000166526	ZNF3	0.00263491	0.618287
TargetScan Human	High (predicted)	ENSG00000188227	ZNF793	0.0386184	1.44786
hsa-mir-205	R fold= 1.383
Source	Confidence	ID	Symbol	q#value	R#fold
TargetScan Human	High (predicted)	ENSG00000115977	AAK1	0.00273113	0.508134
TargetScan Human	High (predicted)	ENSG00000138443	ABI2	0.0136402	1.66812
TargetScan Human	High (predicted)	ENSG00000143727	ACP1	0.0274795	0.719549
TargetScan Human	High (predicted)	ENSG00000151726	ACSL1	0.0297829	0.489562
TargetScan Human	High (predicted)	ENSG00000068366	ACSL4	0.0206337	0.793209
TargetScan Human	High (predicted)	ENSG00000172493	AFF1	0.033733	0.725208
TargetScan Human	High (predicted)	ENSG00000144218	AFF3	0.0424066	1.87855
TargetScan Human	High (predicted)	ENSG00000166747	AP1G1	0.0258698	0.644414
TargetScan Human	High (predicted)	ENSG00000176597	B3GNT5	0.0125605	0.347074
TargetScan Human	High (predicted)	ENSG00000158470	B4GALT5	0.000498361	0.247116
TargetScan Human	High (predicted)	ENSG00000118276	B4GALT6	0.0188104	0.791847
TargetScan Human	High (predicted)	ENSG00000012048	BRCA1	0.0297841	0.790436
TargetScan Human	High (predicted)	ENSG00000132640	BTBD3	0.00226695	0.445367
TargetScan Human	High (predicted)	ENSG00000070269	C14orf101	0.0237804	1.4912
TargetScan Human	High (predicted)	ENSG00000082213	C5orf22	0.0251724	0.642812
TargetScan Human	High (predicted)	ENSG00000127022	CANX	0.00180441	0.542721
TargetScan Human	High (predicted)	ENSG00000166734	CASC4	0.0216332	1.53354
TargetScan Human	High (predicted)	ENSG00000108468	CBX1	0.024225	1.38403
TargetScan Human	High (predicted)	ENSG00000125633	CCDC93	0.00687392	0.503662
TargetScan Human	High (predicted)	ENSG00000107443	CCNJ	0.0133869	0.796861
TargetScan Human	High (predicted)	ENSG00000058091	CDK14		2.232
TargetScan Human	High (predicted)	ENSG00000117724	CENPF	0.00308127	0.277112
TargetScan Human	High (predicted)	ENSG00000204116	CHIC1	0.0309059	1.28271
TargetScan Human	High (predicted)	ENSG00000141367	CLTC	0.00172144	0.513933
TargetScan Human	High (predicted)	ENSG00000183723	CMTM4	0.0117434	0.755844
TargetScan Human	High (predicted)	ENSG00000137449	CPEB2	0.00616431	0.713659
TargetScan Human	High (predicted)	ENSG00000110090	CPT1A	0.0338578	0.589026
TargetScan Human	High (predicted)	ENSG00000165168	CYBB	0.00427117	0.274723
TargetScan Human	High (predicted)	ENSG00000150672	DLG2	0.0386711	1.80835
TargetScan Human	High (predicted)	ENSG00000104093	DMXL2	0.000955417	0.301264
TargetScan Human	High (predicted)	ENSG00000136048	DRAM1		0.718391
TargetScan Human	High (predicted)	ENSG00000101412	E2F1	0.0078122	0.664914
TargetScan Human	High (predicted)	ENSG00000112242	E2F3	0.0246106	0.671815
TargetScan Human	High (predicted)	ENSG00000164181	ELOVL7	0.0255456	0.588424
TargetScan Human	High (predicted)	ENSG00000124882	EREG	0.00115482	0.232399
TargetScan Human	High (predicted)	ENSG00000116285	ERRFI1	0.0296065	0.689789
TargetScan Human	High (predicted)	ENSG00000139163	ETNK1	0.0180938	1.95392
TargetScan Human	High (predicted)	ENSG00000107362	FAM108B1	0.0384255	0.675922
TargetScan Human	High (predicted)	ENSG00000122591	FAM126A	0.029019	1.81809
TargetScan Human	High (predicted)	ENSG00000168672	FAM84B	0.0316582	0.780741
TargetScan Human	High (predicted)	ENSG00000138641	HERC3	0.0381121	0.705277
TargetScan Human	High (predicted)	ENSG00000148110	HIATL1	0.0017793	0.526517
TargetScan Human	High (predicted)	ENSG00000165119	HNRNPK		0.73046
TargetScan Human	High (predicted)	ENSG00000002587	HS3ST1	0.00450434	1.62926
TargetScan Human	High (predicted)	ENSG00000155304	HSPA13		0.643501
TargetScan Human	High (predicted)	ENSG00000181873	IBA57		0.812348
TargetScan Human	High (predicted)	ENSG00000115594	IL1R1	0.0488851	0.536982
TargetScan Human	High (predicted)	ENSG00000132849	INADL	0.0412138	1.47026
TargetScan Human	High (predicted)	ENSG00000122641	INHBA	0.0257633	0.653286
TargetScan Human	High (predicted)	ENSG00000161638	ITGA5	0.0264178	0.55493
TargetScan Human	High (predicted)	ENSG00000116679	IVNS1ABP	0.00378075	0.296544
TargetScan Human	High (predicted)	ENSG00000119682	KIAA0317	0.00286662	0.556664
TargetScan Human	High (predicted)	ENSG00000114982	KIAA1310	0.00669427	0.57353
TargetScan Human	High (predicted)	ENSG00000109787	KLF3	0.00647948	0.357798
TargetScan Human	High (predicted)	ENSG00000114030	KPNA1	0.0324401	0.634606
TargetScan Human	High (predicted)	ENSG00000135338	LCA5		0.765111
TargetScan Human	High (predicted)	ENSG00000145685	LHFPL2	0.0123806	0.702035
TargetScan Human	High (predicted)	ENSG00000123384	LRP1	0.00172144	0.44427
TargetScan Human	High (predicted)	ENSG00000188906	LRRK2	0.0184126	1.97496
TargetScan Human	High (predicted)	ENSG00000123066	MED13L	0.0142706	0.713223
TargetScan Human	High (predicted)	ENSG00000071073	MGAT4A	0.0158109	0.553226
TargetScan Human	High (predicted)	ENSG00000165175	MID1IP1	0.0329305	0.571566
TargetScan Human	High (predicted)	ENSG00000155545	MIER3	0.0376022	0.651552
TargetScan Human	High (predicted)	ENSG00000120162	MOBKL2B	0.0201468	0.785919
TargetScan Human	High (predicted)	ENSG00000127989	MTERF	0.0314366	0.847713
TargetScan Human	High (predicted)	ENSG00000188786	MTF1	0.00173484	0.680653
TargetScan Human	High (predicted)	ENSG00000089818	NECAP1	0.00460507	0.61043
TargetScan Human	High (predicted)	ENSG00000152270	PDE3B	0.0110286	0.478154
TargetScan Human	High (predicted)	ENSG00000113448	PDE4D	0.00226695	0.307091
TargetScan Human	High (predicted)	ENSG00000077684	PHF17	0.0173094	0.740635
TargetScan Human	High (predicted)	ENSG00000198961	PJA2	0.0303233	0.675609
TargetScan Human	High (predicted)	ENSG00000182621	PLCB1	0.00926129	0.773217
TargetScan Human	High (predicted)	ENSG00000115956	PLEK	0.0230527	0.445187
TargetScan Human	High (predicted)	ENSG00000111110	PPM1H	0.00733197	0.708373
TargetScan Human	High (predicted)	ENSG00000134748	PRPF38A	0.00423093	0.660052
TargetScan Human,miRecords	Experimentally Observed,High (predicted)	ENSG00000171862	PTEN	0.0103269	1.3162
TargetScan Human	High (predicted)	ENSG00000112531	QKI	0.0295451	0.712607
TargetScan Human	High (predicted)	ENSG00000181467	RAP2B	0.00222825	0.546054
TargetScan Human	High (predicted)	ENSG00000124813	RUNX2	0.0122166	0.657815
TargetScan Human	High (predicted)	ENSG00000117479	SLC19A2	0.00692339	0.441043
TargetScan Human	High (predicted)	ENSG00000183032	SLC25A21	0.00658236	0.673324
TargetScan Human	High (predicted)	ENSG00000170365	SMAD1	0.00631726	0.562759
TargetScan Human	High (predicted)	ENSG00000165209	STRBP	0.0152049	2.28537
TargetScan Human	High (predicted)	ENSG00000077147	TM9SF3	0.00782058	0.610418
TargetScan Human	High (predicted)	ENSG00000170417	TMEM182	0.0120821	1.75424
TargetScan Human	High (predicted)	ENSG00000145779	TNFAIP8	0.0189395	1.8674
TargetScan Human	High (predicted)	ENSG00000083312	TNPO1	0.0351444	0.722082
TargetScan Human	High (predicted)	ENSG00000143514	TP53BP2	0.00513264	0.586105
TargetScan Human	High (predicted)	ENSG00000104447	TRPS1	0.0476527	0.677237
TargetScan Human	High (predicted)	ENSG00000198431	TXNRD1	0.00865034	0.516564
TargetScan Human	High (predicted)	ENSG00000132388	UBE2G1	0.0104397	1.40293
TargetScan Human,miRecords	Experimentally Observed,High (predicted)	ENSG00000112715	VEGFA		0.686342
TargetScan Human	High (predicted)	ENSG00000047644	WWC3	0.0137674	1.62823
TargetScan Human	High (predicted)	ENSG00000143324	XPR1	0.0296194	0.751553
TargetScan Human	High (predicted)	ENSG00000176105	YES1	0.0123221	0.601838
TargetScan Human	High (predicted)	ENSG00000177311	ZBTB38	0.0247084	1.39846
TargetScan Human	High (predicted)	ENSG00000140948	ZCCHC14	0.0289145	0.805364
TargetScan Human,miRecords	Experimentally Observed,Moderate (predicted)	ENSG00000169554	ZEB2		0.627353
TargetScan Human	High (predicted)	ENSG00000096654	ZNF184	0.0466888	0.766512
TargetScan Human	High (predicted)	ENSG00000166704	ZNF606	0.0121411	1.30603
TargetScan Human	High (predicted)	ENSG00000180357	ZNF609	0.017647	1.54595
TargetScan Human	High (predicted)	ENSG00000070476	ZXDC	0.0174512	0.799863
miR-1-1/miR-206	hsa-mir-1-1 : 0.703
	hsa-mir-206: 0.708
Source	Confidence	ID	Symbol	q#value	R#fold
TargetScan Human	High (predicted)	ENSG00000140526	ABHD2	0.0392734	0.649611
TargetScan Human	High (predicted)	ENSG00000138443	ABI2	0.0136402	1.66812
TargetScan Human	High (predicted)	ENSG00000100077	ADRBK2	0.026397	1.71057
TarBase,TargetScan Human	Experimentally Observed,Moderate (predicted)	ENSG00000116771	AGMAT	0.00984423	1.51804
TargetScan Human	High (predicted)	ENSG00000023516	AKAP11	0.0268675	1.64805
TargetScan Human	High (predicted)	ENSG00000119523	ALG2	0.00688082	0.77342
TargetScan Human	High (predicted)	ENSG00000143401	ANP32E	0.00805498	0.766503
TarBase	Experimentally Observed	ENSG00000166825	ANPEP	0.00856015	0.364014
TargetScan Human	High (predicted)	ENSG00000166747	AP1G1	0.0258698	0.644414
TarBase,TargetScan Human,miRecords	Experimentally Observed,Moderate (predicted)	ENSG00000168374	ARF4	0.0118269	0.597866
TarBase,TargetScan Human	Experimentally Observed,High (predicted)	ENSG00000129691	ASH2L	0.0180938	0.720449
TargetScan Human	High (predicted)	ENSG00000198363	ASPH	0.0143877	0.749579
TargetScan Human	High (predicted)	ENSG00000162174	ASRGL1	0.0401557	0.749992
TargetScan Human	High (predicted)	ENSG00000143970	ASXL2	0.0185278	1.85768
TargetScan Human	High (predicted)	ENSG00000175224	ATG13		0.740192
TargetScan Human	High (predicted)	ENSG00000114573	ATP6V1A	0.0159894	0.608509
TargetScan Human,miRecords	Experimentally Observed,High (predicted)	ENSG00000147416	ATP6V1B2	0.0230157	0.585009
TarBase,TargetScan Human	Experimentally Observed,Moderate (predicted)	ENSG00000083123	BCKDHB	0.0318757	1.57423
miRecords	Experimentally Observed	ENSG00000171791	BCL2	0.0310091	2.13244
TargetScan Human	High (predicted)	ENSG00000162813	BPNT1	0.0338545	1.74947
TargetScan Human	High (predicted)	ENSG00000166272	C10orf26	0.00435163	1.9192
TarBase,miRecords	Experimentally Observed	ENSG00000143443	C1orf56	0.0310591	1.21892
TargetScan Human	High (predicted)	ENSG00000124098	C20orf108	0.0398763	0.645121
TargetScan Human	High (predicted)	ENSG00000178074	C2orf69		0.648929
TargetScan Human	High (predicted)	ENSG00000163683	C4orf34	0.0145959	3.98434
TarBase,TargetScan Human,miRecords	Experimentally Observed,High (predicted)	ENSG00000131236	CAP1	0.00226695	0.580654
TargetScan Human	High (predicted)	ENSG00000135387	CAPRIN1	0.0364191	0.777457
TargetScan Human	High (predicted)	ENSG00000163492	CCDC141	0.0290422	2.31599
TargetScan Human	High (predicted)	ENSG00000135205	CCDC146	0.0170602	1.46894
TargetScan Human	High (predicted)	ENSG00000178562	CD28	0.0519524	0.565122
TarBase	Experimentally Observed	ENSG00000163814	CDCP1	0.038845	0.688353
TarBase,TargetScan Human,miRecords	Experimentally Observed,High (predicted)	ENSG00000058091	CDK14		2.232
TargetScan Human	High (predicted)	ENSG00000105810	CDK6	0.000429357	0.226511
TargetScan Human,miRecords	Experimentally Observed,High (predicted)	ENSG00000136807	CDK9	0.00754872	0.711158
TargetScan Human	High (predicted)	ENSG00000164442	CITED2	0.0115299	0.597931
TarBase,TargetScan Human,miRecords	Experimentally Observed,High (predicted)	ENSG00000109572	CLCN3	0.0417373	0.676344
TargetScan Human	High (predicted)	ENSG00000102805	CLN5	0.0205137	1.52706
TargetScan Human	High (predicted)	ENSG00000141367	CLTC	0.00172144	0.513933
TarBase,TargetScan Human	Experimentally Observed,High (predicted)	ENSG00000110880	CORO1C	0.00423093	0.473301
TargetScan Human	High (predicted)	ENSG00000214575	CPEB1	0.0258409	1.78478
TarBase	Experimentally Observed	ENSG00000080819	CPOX	0.0036246	0.445988
TargetScan Human	High (predicted)	ENSG00000111269	CREBL2	0.0228476	2.13636
TarBase	Experimentally Observed	ENSG00000109861	CTSC	0.0228316	0.635417
TargetScan Human	High (predicted)	ENSG00000143079	CTTNBP2NL	0.00845094	0.741343
TargetScan Human	High (predicted)	ENSG00000100592	DAAM1	0.0284	0.700502
TarBase,TargetScan Human,miRecords	Experimentally Observed,High (predicted)	ENSG00000109606	DHX15	0.00673604	0.559094
TargetScan Human	High (predicted)	ENSG00000150672	DLG2	0.0386711	1.80835
TargetScan Human	High (predicted)	ENSG00000132535	DLG4	0.0358746	0.820743
TargetScan Human	High (predicted)	ENSG00000101152	DNAJC5	0.0343126	0.714209
TargetScan Human	High (predicted)	ENSG00000133740	E2F5	0.025226	2.62402
TargetScan Human	High (predicted)	ENSG00000163412	EIF4E3	0.00759785	0.48788
TarBase,TargetScan Human,miRecords	Experimentally Observed,High (predicted)	ENSG00000143924	EML4	0.00488693	0.49833
TargetScan Human	High (predicted)	ENSG00000082805	ERC1	0.00799658	1.45902
TargetScan Human	High (predicted)	ENSG00000183688	FAM101B	0.0111105	0.233737
TargetScan Human	High (predicted)	ENSG00000065809	FAM107B	0.0265519	0.71361
TargetScan Human	High (predicted)	ENSG00000152102	FAM168B		0.746826
TargetScan Human	High (predicted)	ENSG00000183508	FAM46C	0.0185728	0.548152
TargetScan Human	High (predicted)	ENSG00000128923	FAM63B	0.00800979	1.8846
TargetScan Human	High (predicted)	ENSG00000176853	FAM91A1	0.0180565	0.58692
TargetScan Human	High (predicted)	ENSG00000139132	FGD4	0.0353151	0.57273
TargetScan Human	High (predicted)	ENSG00000137942	FNBP1L	0.033187	0.638443
TargetScan Human	High (predicted)	ENSG00000075420	FNDC3B	0.00293295	0.422624
TarBase,TargetScan Human,miRecords	Experimentally Observed,Moderate (predicted)	ENSG00000163430	FSTL1	0.0503735	0.658276
TargetScan Human	High (predicted)	ENSG00000138757	G3BP2	0.0538631	0.649836
TarBase,TargetScan Human,miRecords	Experimentally Observed,High (predicted)	ENSG00000160211	G6PD	0.0377483	0.598991
TarBase	Experimentally Observed	ENSG00000147533	GOLGA7	0.0151404	0.706605
TargetScan Human	High (predicted)	ENSG00000113384	GOLPH3	0.0479173	0.863952
Ingenuity Expert Findings,TarBase,TargetScan Human	Experimentally Observed,High (predicted)	ENSG00000115159	GPD2	0.0280815	1.59409
TargetScan Human	High (predicted)	ENSG00000198055	GRK6	0.0273049	0.740273
TargetScan Human	High (predicted)	ENSG00000156875	HIAT1	0.0117149	0.504917
TargetScan Human	High (predicted)	ENSG00000181061	HIGD1A	0.0471197	0.724539
TargetScan Human	High (predicted)	ENSG00000113161	HMGCR	0.00217064	0.521317
TargetScan Human	High (predicted)	ENSG00000165119	HNRNPK		0.73046
TargetScan Human	High (predicted)	ENSG00000166598	HSP90B1	0.0434277	0.71023
TarBase,TargetScan Human,miRecords	Experimentally Observed,High (predicted)	ENSG00000144381	HSPD1	0.00471723	0.529751
TargetScan Human	High (predicted)	ENSG00000115594	IL1R1	0.0488851	0.536982
TarBase,TargetScan Human,miRecords	Experimentally Observed,Moderate (predicted)	ENSG00000198825	INPP5F	0.0208338	2.2813
TarBase	Experimentally Observed	ENSG00000183856	IQGAP3	0.00887643	0.685617
TargetScan Human	High (predicted)	ENSG00000008083	JARID2	0.00428247	0.490531
TargetScan Human	High (predicted)	ENSG00000100221	JOSD1	0.0115707	0.473648
TargetScan Human	High (predicted)	ENSG00000169926	KLF13	0.00931804	0.558659
TarBase,TargetScan Human,miRecords	Experimentally Observed,High (predicted)	ENSG00000143418	LASS2	0.0511575	0.743814
TargetScan Human	High (predicted)	ENSG00000105983	LMBR1	0.00318067	0.679106
TarBase,TargetScan Human	Experimentally Observed,Moderate (predicted)	ENSG00000123384	LRP1	0.00172144	0.44427
TargetScan Human	High (predicted)	ENSG00000011566	MAP4K3	0.00406692	0.489452
TargetScan Human	High (predicted)	ENSG00000176274	MCART6	0.0313082	1.34568
TargetScan Human	High (predicted)	ENSG00000108590	MED31	0.0227759	1.40372
miRecords	Experimentally Observed	ENSG00000068305	MEF2A	0.00295048	1.52953
TargetScan Human	High (predicted)	ENSG00000143995	MEIS1	0.0192811	0.665844
TargetScan Human	High (predicted)	ENSG00000071073	MGAT4A	0.0158109	0.553226
TargetScan Human	High (predicted)	ENSG00000198160	MIER1	0.00433188	0.72413
