# Supplementary material for: Molecular Characterization of Chronic Lymphocytic Leukemia Patients with a High Number of Losses in 13q14
Source: PLoS One. 2012 Nov 13;7(11):e48485. doi: 10.1371/journal.pone.0048485 (PMC3496725; doi:10.1371/journal.pone.0048485)
Supplement: Table S5 — Functional analysis of the potential target genes of the deregulated miRNAs in CLL patients with a high number of 13q- cells (13q-H). The 432 mRNA target genes that showed an inverse relationship with miRNA expression level were input into Ingenuity (Ingenuity Systems, Inc.) and core analysis was then performed to retrieve the target genes’ association with biological functions of relevance in CLL. (XLS) [file pone.0048485.s009.xls]

## Sheet: TableS5
Table S5.	Functional analysis of the potential target genes of the deregulated miRNAs in CLL patients with a high number of 13q- cells (13q-H).
	The 432 mRNA target genes that showed an inverse relationship with miRNA expression level were input into Ingenuity (Ingenuity Systems, Inc.) and core analysis was then performed to retrieve the target genes’ association with biological functions of relevance in CLL.
Category	Functions Annotation	p-Value	Molecules	Molecules (n)
Gene Expression	Transcription	1,56E-13	ADRB2,AFF1,AFF3,ARRB2,ATXN1,BCL2,BLZF1,BMPR1A,BMPR2,BPTF,BRCA1,CAMK2D,CBX1,CDC25B,CENPF,CHAF1A,CREBL2,CRTC1,CRY1,CSF1R,CTNNB1,CUX1,DACH1,DRAP1,E2F1,E2F2,E2F3,E2F5,EPAS1,EREG,FOS,FZD5,GNA13,GTF2H1,HNRNPK,IKBKE,INHBA,IRF2,ITGA5,IVNS1ABP,JAK2,JARID2,LEF1,LRP1,MAFB,MAP2K6,MAP3K12,MAP3K14,MED31,MEF2A,MEF2C,MEIS1,MID1IP1,MKL2,MLL,MLLT6,MTERF,MTF1,MYB,MYD88,NLK,PEA15,PHF21A,PICALM,PIK3R1,PKNOX1,PLCB1,PO…	97
Gene Expression	Transcription of DNA	2,94E-13	ADRB2,AFF1,AFF3,ARRB2,ATXN1,BCL2,BLZF1,BMPR1A,BMPR2,BPTF,BRCA1,CAMK2D,CBX1,CDC25B,CENPF,CHAF1A,CREBL2,CRTC1,CRY1,CSF1R,CTNNB1,CUX1,DACH1,DRAP1,E2F1,E2F2,E2F3,E2F5,EPAS1,EREG,FOS,FZD5,GNA13,GTF2H1,HNRNPK,IKBKE,INHBA,IRF2,ITGA5,IVNS1ABP,JAK2,JARID2,LEF1,LRP1,MAFB,MAP2K6,MAP3K12,MAP3K14,MED31,MEF2A,MEF2C,MEIS1,MKL2,MLL,MLLT6,MTERF,MTF1,MYB,MYD88,NLK,PHF21A,PICALM,PIK3R1,PKNOX1,PLCB1,POU2F2,PTEN,PURA…	94
Cellular Growth and Proliferation	Proliferation of blood cells	6,68E-10	ADRB2,B3GNT5,BCL2,BRCA1,BTLA,CD36,CSF1R,CSNK1A1,CTNNB1,E2F2,EPHB6,GCNT1,IL1R1,INHBA,ITK,JAK2,KCNN4,LEF1,MEF2C,MEIS1,MLL,MS4A1,MYB,MYD88,P2RX7,PDCD1LG2,PDE4D,PEA15,PIK3R1,POU2F2,PTEN,PTPRO,PURA,RELT,SATB1,SH2B3,STAT1,TCL1A,TOX,VEGFA	42
Post-Translational Modification	Modification of protein	4,61E-04	AAK1,ACP1,ADRBK2,ARRB2,ATG3,B3GNT5,BCL2,BMPR1A,BMPR2,BRCA1,CANX,CD36,CDK14,CHM,CSF1R,CSNK1A1,CYBB,EPHB6,FASTK,GCNT1,GTF2H1,IKBKE,MAP2K6,MAP3K12,MAP3K14,MAP3K9,NLK,P2RX7,PIK3R1,PPAP2A,PTEN,PTPRO,SMAD1,SSH2,SUMO3,TAOK3,UBE2G1,UBE2S,USP28,VEGFA,YES1	41
Cancer	Hematological neoplasia	3,02E-05	AICDA,BCL2,BRCA1,CHAF1A,CPT1A,CSF1R,CTNNB1,CUX1,E2F1,E2F2,E2F3,INHBA,ITGA5,JAK2,LPP,MEIS1, MLL,MS4A1,MYB,P2RX7,PDCD1LG2,PDE3B,PDE4D,PDE7B,PICALM,PIK3R1,PTEN,RAD51,RUNX2,SATB1,TCL1A,VEGFA,YES1	39
Hematological System Development and Function	Proliferation of immune cells	4,03E-09	ADRB2,B3GNT5,BCL2,BRCA1,BTLA,CD36,CSF1R,CSNK1A1,CTNNB1,E2F2,EPHB6,GCNT1,IL1R1,INHBA,ITK,KCNN4,LEF1,MEF2C,MEIS1, MLL,MS4A1,MYB,MYD88,P2RX7,PDCD1LG2,PDE4D,PEA15,PIK3R1,POU2F2,PTEN,PURA,RELT,SATB1,SH2B3,STAT1,TCL1A,TOX	39
Cellular Growth and Proliferation	Proliferation of lymphocytes	1,75E-07	ADRB2,B3GNT5,BCL2,BRCA1,BTLA,CD36,CSNK1A1,CTNNB1,E2F2,EPHB6,GCNT1,IL1R1,INHBA,ITK,KCNN4,LEF1,MEF2C, MS4A1,MYB,MYD88,P2RX7,PDCD1LG2,PDE4D,PEA15,PIK3R1,POU2F2,PTEN,RELT,SATB1,SH2B3,STAT1,TCL1A,TOX	34
Gene Expression	Activation of protein binding site	4,94E-08	BCL2,CRY1,CSF1R,CTNNB1,E2F1,E2F2,E2F3,E2F5,EPAS1,FOS,GTF2H1,INHBA,IRF2,JAK2,LEF1,MAFB,MAP3K14,MEF2A,MEF2C,MYB,MYD88,PLCB1,PTEN,RIPK1,RUNX2,SATB1,SLA,SMAD1,SP1,SP3,STAT1,TCF7L2,VEGFA	33
Cellular Movement	Leukocyte migration	6,36E-04	ADRB2,ARRB2,BMPR1A,BMPR2,BTLA,CD36,CSF1R,CYBB,EPAS1,F13A1,GCNT1,GNA13,IL1R1,INHBA,ITGA5,ITGA9,ITK,JAK2,MAP3K14,MTAP,MYD88,NARS,PDE4D,PIK3R1,PNOC,PTEN,PTPRO,SH2B3,STAT1,TMSB10/TMSB4X,UCP2,VEGFA	32
Immune Cell Trafficking	Leukocyte migration	6,36E-04	ADRB2,ARRB2,BMPR1A,BMPR2,BTLA,CD36,CSF1R,CYBB,EPAS1,F13A1,GCNT1,GNA13,IL1R1,INHBA,ITGA5,ITGA9,ITK,JAK2,MAP3K14,MTAP,MYD88,NARS,PDE4D,PIK3R1,PNOC,PTEN,PTPRO,SH2B3,STAT1,TMSB10/TMSB4X,UCP2,VEGFA	32
Cancer	Hematologic cancer	3,33E-04	BCL2,CHAF1A,CPT1A,CSF1R,CTNNB1,CUX1,E2F1,E2F2,E2F3,ITGA5,JAK2,LPP,MEIS1, MLL,MS4A1,MYB,P2RX7,PDE3B,PDE4D,PDE7B,PICALM,PTEN,RAD51,RUNX2,SATB1,VEGFA,YES1	31
Gene Expression	Expression of gene	6,90E-08	BCL2,BRCA1,CAMK2D,CBX1,CDC25B,CTNNB1,E2F1,E2F2,E2F3,E2F5,EPAS1,FOS,GTF2H1,INHBA,JAK2,LEF1,MAP2K6,MEF2A,MLL,PKNOX1,PTEN,RCOR1,RUNX2,SMAD1,SMARCB1,SOS1,SP1,SP3,STAT1,VEGFA	30
