# Supplementary material for: Molecular Characterization of Chronic Lymphocytic Leukemia Patients with a High Number of Losses in 13q14
Source: PLoS One. 2012 Nov 13;7(11):e48485. doi: 10.1371/journal.pone.0048485 (PMC3496725; doi:10.1371/journal.pone.0048485)
Supplement: Table S6 — Most significant differentially expressed genes in patients with 80% or more cells showing 13q- (13q-H) and 17p/11q deletion compared with 13q-L patients. (Upper: overexpressed; Lower: underexpressed in 13q-H, 17p- and 11q- patients with respect to the 13q-L CLL patients). (XLS) [file pone.0048485.s010.xls]

## Sheet: Table S6
Table S6.	Most significant differentially expressed genes in patients with 80% or more cells showing 13q- (13q-H) and 17p/11q deletion compared with 13q-L patients
	(Upper: overexpressed; Lower: underexpressed in 13q-H, 17p- and 11q- patients with respect to the 13q-L CLL patients).
Ingenuity Canonical Pathway	p-value	Genes	Expression
Mitotic Roles of Polo-Like Kinase	6.30957e-06	KIF23,CDC25C,ESPL1,CDC20,PRC1,CCNB2,PLK1,CDK1,CCNB1,PLK4,PKMYT1,PPP2R1B,KIF11,CDC25A	down
B Cell Receptor Signaling	5.7544e-05	BLNK,MAP2K6,CAMK2D,CD79B,BAD,POU2F2,SYK,FCGR2B,PTEN,ATM,PRKCB	up
Nicotinate and Nicotinamide Metabolism	0.000537032	SGK1,CSNK1D,CDK6,PLK1,TTK,CDK1,NEK2,ARAF,GRK6,PNP,MAP2K3,HIPK1,NMNAT3,CDK2,BST1	down
Molecular Mechanisms of Cancer	0.00288403	MAP2K6,APH1B,BAD,RHOC,BMPR2,JAK2,BCL2,NLK,CAMK2D,E2F5,LEF1,ARHGEF9,PRKCB,ATM	up
ATM Signaling	0.00398107	RAD51,CDC25C,GADD45A,CCNB2,CDK1,CDK2,CDC25A,CHEK1,CCNB1	down
Cell Cycle: G2/M DNA Damage Checkpoint Regulation	0.00524807	CDC25C,GADD45A,CCNB2,PKMYT1,PLK1,CDK1,CHEK1,CCNB1	down
PI3K Signaling in B Lymphocytes	0.00724436	BLNK,CAMK2D,CD79B,SYK,FCGR2B,PTEN,PRKCB	up
Phospholipase C Signaling	0.0151356	BLNK,PEBP1,CD79B,RHOC,SYK,MEF2A,FCGR2B,ARHGEF9,PRKCB	up
Interferon Signaling	0.0165959	OAS1,JAK2,BCL2	up
Role of BRCA1 in DNA Damage Response	0.0186209	RAD51,E2F4,GADD45A,E2F1,PLK1,BRIP1,E2F2,CHEK1	down
NF-κB Signaling	0.0239883	MAP2K6,TLR6,TLR7,BMPR2,TRAF5,ATM,PRKCB	up
